1 **Full Title: Toward Precision Molecular Surgery: Robust, Selective**

2 **Induction of Microhomology-mediated End Joining *in vivo***

3 Short Title: MMEJ-based approach for precision genome engineering

4 *in vivo*

5 **Author Names and Affiliation**

6 **Hiroataka Ata<sup>1,2,3,4</sup>, Thomas L. Ekstrom<sup>1,4</sup>, Gabriel Martínez-Gálvez<sup>2,4</sup>, Carla M.**

7 **Mann<sup>4,5</sup>, Alexey V. Dvornikov<sup>6</sup>, Kyle J. Schaeffbauer<sup>6</sup>, Alvin C. Ma<sup>7</sup>, Drena Dobbs<sup>4,5</sup>,**

8 **Karl J. Clark<sup>4,6</sup>, and Stephen C. Ekker<sup>1,4,6</sup>**

9 <sup>1</sup>Mayo Clinic, Center for Clinical and Translational Science. Rochester, MN, USA

10 <sup>2</sup>Mayo Clinic, Graduate School of Biomedical Sciences. Rochester, MN, USA

11 <sup>3</sup>Mayo Clinic, Medical Scientist Training Program, Rochester, MN, USA

12 <sup>4</sup>Iowa State/Mayo Clinic Alliance for Genome Engineering

13 <sup>5</sup>Iowa State University, Genetics, Development, and Cell Biology, Ames, IA, USA

14 <sup>6</sup>Mayo Clinic, Biochemistry and Molecular Biology. Rochester, MN, USA

15 <sup>7</sup>The University of Hong Kong, Department of Paediatrics and Adolescent Medicine,

16 Hong Kong, Hong Kong

17

18 **Author Contribution**

19 **HA** contributed in Conceptualization, Data Curation, Formal Analysis, Investigation,

20 Funding Acquisition, Methodology, Validation, Visualization, Writing – Original draft

21 preparation, and Writing – Review and Editing. **TLE** contributed in Data Curation,

22 Investigation, Writing – Original draft preparation, and Writing – Review and Editing.

23 **GMG** contributed in Software, Validation, and Writing. **CMM** contributed in Software

24 Validation, and Writing. **AVD** contributed in Investigation, Methodology, Validation, and  
25 Writing – Review and Editing. **KJS** contributed in Investigation and Writing – Review  
26 and Editing. **ACM** contributed in Conceptualization, Data Curation, Investigation, and  
27 Writing – Review and Editing. **DD** contributed in Funding Acquisition, Resources, and  
28 Writing – Review and Editing. **KJC** contributed in Conceptualization, Funding  
29 Acquisition, Resources, Supervision, and Writing – Review and Editing. **SCE**  
30 contributed in Conceptualization, Funding Acquisition, Project Administration,  
31 Resources, Supervision, Writing – Review and Editing.  
32

33 **Abstract:**

34           One key problem in precision genome editing is the resultant unpredictable  
35 plurality of sequence outcomes at the site of targeted DNA double-strand breaks  
36 (DSBs). This is due to the typical activation of the versatile Non-homologous End  
37 Joining (NHEJ) pathway. Such unpredictability limits the utility of somatic gene editing  
38 for applications including gene therapy and functional genomics. For germline editing  
39 work, the accurate reproduction of identical alleles using NHEJ is a labor intensive  
40 process. In this study, we propose inducing Microhomology-mediated End Joining  
41 (MMEJ) as a viable solution for improving somatic sequence homogeneity *in vivo*,  
42 capable of generating a single predictable allele at high rates (56% ~ 86% of the entire  
43 mutant allele pool). Using a combined dataset from zebrafish (*Danio rerio*) *in vivo* and  
44 human HeLa cell *in vitro* as a training dataset, we identified specific contextual  
45 sequence determinants surrounding genomic DSBs for robust MMEJ pathway  
46 activation. We then applied our observation and prospectively designed MMEJ-inducing  
47 sgRNAs against a variety of proof-of-principle genes and demonstrated a high level of  
48 mutant allele homogeneity at these loci. F0 mutant zebrafish embryos and larvae  
49 generated with these gRNAs faithfully recapitulated previously reported, recessive loss-  
50 of-function phenotypes. We also provide a novel algorithm MENTHU  
51 (<http://genesculpt.org/menthu/>) for improved prediction of candidate MMEJ loci, suitable  
52 for both targeted and genome-wide applications. We believe that this MMEJ-centric  
53 approach will have a broad impact on genome engineering and its applications. For  
54 example, whereas somatic mosaicism hinders efficient recreation of a knockout mutant  
55 allele at base pair resolution via the standard NHEJ-based approach, we demonstrate

56 that F0 founders transmitted the identical MMEJ allele of interest at high rates. Most  
57 importantly, the ability to directly dictate the reading frame of an endogenous target will  
58 have important implications for gene therapy applications in human genetic diseases.

59 **Author Summary:**

60           New gene editing tools precisely break DNA at pre-defined genomic locations,  
61 but cells repair these lesions using diverse pathways that often lead to unpredictable  
62 outcomes in the resulting DNA sequences. This sequence diversity in gene editing  
63 outcomes represents an important obstacle to the application of this technology for  
64 human therapies. Using a vertebrate animal as a model system, we provide strong  
65 evidence that we can overcome this obstacle by selectively directing DNA repair of  
66 double-stranded breaks through a lesser-described pathway termed Microhomology-  
67 mediated End Joining (MMEJ). Unlike other, better-understood pathways, MMEJ uses  
68 recurring short sequence patterns surrounding the site of DNA breakage. This enables  
69 the prediction of repair outcomes with improved accuracy. Importantly, we also show  
70 that preferential activation of MMEJ is compatible with effective gene editing. Finally, we  
71 provide a simple algorithm and software for designing DNA-breaking reagents that have  
72 high chance of activating the MMEJ pathway. We believe that the MMEJ-centric  
73 approach to be broadly applicable for a variety of gene editing applications both within  
74 the laboratory and for human therapies.

75 **Introduction:**

76 Programmable nucleases such as TALEN (Transcription Activator-like Effector  
77 Nuclease) and CRISPR (Clustered Regularly Interspaced Short Palindromic Repeats)  
78 systems have enabled a new era of scientific research(1, 2). Instead of relying on  
79 knock-down models or expensively outsourced knockout lines, laboratories across the  
80 world now have tools with which to generate indels (Insertions and deletions) of varying  
81 sizes in the gene(s) of interest. However, DNA Double-strand Break (DSB) repairs  
82 largely result in diverse sequence outcomes owing to the unpredictable nature of the  
83 most commonly used Non-homologous End Joining (NHEJ) pathway(3, 4) (**Fig 1**). This  
84 significantly confounds experimental readouts because knock-out cell lines often harbor  
85 more than just one desired frameshift mutation. In the case of model organisms such as  
86 zebrafish (*Danio rerio*), the F0 founders are genetically mosaic, warranting a complex  
87 and time-consuming series of outcrossing to establish molecularly defined lines before  
88 any biological questions can be addressed(5, 6).

89 In contrast to NHEJ, the MMEJ (Microhomology-mediated End Joining) DNA  
90 repair pathway utilizes a pair of locally available direct sequence repeats on both sides  
91 of a DSB that are apposed, annealed and extended(7-10) (**Fig 1**). As such, DSB repair  
92 outcomes are highly stereotyped, resulting in deletion of the intervening sequence as  
93 well as one of the repeats. Consequentially, there is an increasing interest in utilizing  
94 MMEJ for precision genome engineering applications(11-14). To date, however,  
95 effective harnessing of this pathway remains challenging due to the paucity of genetic  
96 and mechanistic understanding(8).

97 Bae *et al.*(14) developed a sequence-based scoring system to estimate the

98 frequency of MMEJ-associated deletions induced by DSBs in human cells. While this  
99 improved the predictability of MMEJ activation, the DSB repair outcomes tended to  
100 consist of a heterogeneous population of multiple MMEJ alleles. In this study, we sought  
101 to improve upon the existing algorithm with the goal of developing tools to more reliably  
102 predict target loci that would be predisposed to generate a more homogeneous mutant  
103 allele population through MMEJ. We demonstrate the feasibility and utility of such  
104 reagent design on the molecular level (i.e., DNA repair outcomes) and on the  
105 physiological level (i.e., F0 phenotype). We believe our approach can inform and benefit  
106 applications such as rapid phenotype-genotype correlation in F0 animals, with an eye  
107 toward applications in human gene therapy and facilitation of resource sharing and  
108 recreation of various cell and animal lines on a global scale.

109 **Results:**

110 **MMEJ is an Active Repair Pathway in the Genetically Unaltered Zebrafish Embryo**

111 Prior work examining MMEJ activation in vertebrate organisms primarily focused on *in*  
112 *vitro* models (8-10, 14-18). Initial analyses using a targeted knockin strategy suggested  
113 that MMEJ was operational in the zebrafish embryo, though the efficiency of these  
114 MMEJ outcomes was rather modest(13). One study reported incidental identification of  
115 MMEJ inductions at two zebrafish genomic loci using programmable nucleases (19).  
116 However, no consortium – small or large – of genomic loci that repair primarily through  
117 NHEJ vs MMEJ has been compiled. To this end, we examined the repair outcomes of  
118 previously designed TALEN and CRISPR-Cas9 genomic reagents (**S1 Table**). The  
119 plurality of custom enzymes induced diverse sequence outcomes, consistent with NHEJ  
120 being used as the primary DNA repair pathway. However, a few reagents induced  
121 sequence outcomes satisfying the following criteria, suggesting that MMEJ was the  
122 preferred repair pathway: 1) most predominant allele is the top predicted allele by the  
123 Bae *et al.* algorithm(14); 2) most predominant allele comprises  $\geq 50\%$  of the total  
124 mutant allele population; and 3) mutagenic efficiency  $> 20\%$ . For the purpose of this  
125 study, a programmable nuclease satisfying all these criteria is referred to as a “Winner-  
126 Take-All” reagent. Three TALEN (*chrd*, *mitfa* #4 & *surf1*) and two CRISPR-Cas9 (*surf1*  
127 & *tyr* #2) reagents fell into this category (**S1 Table, Fig 2A, Fig 3A**).

128 Injecting the *chrd* TALEN pair (37.5 pg/arm) resulted in characteristic *chrd* loss of  
129 function phenotypes: Intermediate-Cell-Mass (ICM) expansion and a smaller head by 1  
130 day post-fertilization(20) (1 dpf; **Fig 2B**). Median penetrance for Moderate and Severe  
131 phenotypes was 15.8% and 20.0%, respectively (**Fig 2B, S2 Table**). Strong MMEJ



132 activation by this TALEN pair was confirmed by subcloning results (**Fig 2A**) – 16/32  
133 recovered mutant reads corresponded to the top predicted 7bp deletion allele. Similarly,  
134 perturbing *tyr* gene with a CRISPR-Cas9 reagent recapitulated a previously reported  
135 loss of melanin production phenotype, observable by 2 dpf(21) (**Fig 3B**).  
136 Ribonucleoprotein (RNP) delivery at the dose of 300 pg *tyr* #2 sgRNA and 660 pg Cas9  
137 resulted in Moderate and Severe loss of pigmentation phenotypes in 22.7% and 50.0%  
138 of embryos, respectively (**Fig 3B, S2 Table**). Subcloning analysis showed 21/24 (88%;  
139 **Fig 3A**) of resulting alleles contained a 4bp deletion consistent, with strong MMEJ  
140 activation by this CRISPR-Cas9. Together with the *chrd* TALEN results, these data  
141 support that MMEJ can be an effective repair pathway in F0 embryos at some genomic  
142 loci.

143

#### 144 **Many Bae *et al.* Predicted MMEJ Loci Are Preferentially Repaired by NHEJ**

145 A subset of the zebrafish reagents described above was prospectively designed using  
146 the Bae *et al.* algorithm(14) (**S1 Table**). This algorithm calculates the strength of each  
147 pair of microhomology arms according to the length and GC content of each pair, as  
148 well as the length of the intervening sequence (i.e., *Pattern Score*). The additive sum of  
149 all the possible *Pattern Scores* is then returned as *Microhomology Score*. This latter  
150 score was found to have positive correlation with the rate of MMEJ activation in HeLa  
151 cells(14). All fourteen prospectively designed reagents had a *Microhomology Score* of at  
152 least 4000 – a median score found on human *BRCA1* gene. However, only four of these  
153 reagents induced majority MMEJ outcomes as judged by the *Microhomology Fraction*  
154 (**S1 Table, S1 Note**). We therefore retrospectively analyzed the repair outcomes of

155 these reagents to identify additional factor(s) that could enhance predictability of MMEJ  
156 induction.

157

158 **Rate of Pattern Score Change as a Discrimination Factor for MMEJ Induction *in***  
159 ***vivo and in vitro***

160 Intriguingly, when the pattern score values clustered closely to one another (i.e.,  
161 a flatter *Slope Value* as calculated according to **S2 Note**), this was indicative of an  
162 unfavorable target for MMEJ activation in zebrafish embryos. Conversely, loci at which  
163 pattern scores dropped precipitously (i.e., a steeper *Slope Value*) were good candidates  
164 for MMEJ activation *in vivo* ( $p = 0.0048$ ; **S1 Figure**). Based on these observations, we  
165 hypothesized that locally available microhomology pairs are in direct competition with  
166 one another, such that overabundance of these pairs is a negative predictor of MMEJ  
167 activation. In other words, MMEJ activation is more favorable at loci with only one or two  
168 predominant microhomology pair(s) (Low Competition loci) rather than many strong  
169 microhomology pairs (High Competition loci).

170 To determine whether the zebrafish-based hypothesis was generalizable to  
171 human cells (HeLa), we re-analyzed the deep sequencing dataset used to generate the  
172 Bae *et al.* algorithm(14). Available results from 90 genomic loci were sorted  
173 alphabetically by the names of target genes. Outcomes from the first 50 targets showed  
174 a correlation similar to that observed in zebrafish; higher *Microhomology Fractions*  
175 generally correlated with low *Slope Values* from the first 50, alphabetically sorted  
176 targets ( $p = 0.00001$ ; **S2 Figure A**). This correlation was lost when microhomology arms  
177 of 2 bp were included in the analysis ( $p = 0.2644$ ; **S2 Figure B**). Accordingly,

178 microhomology arms of less than 3 bp were excluded from subsequent analyses. The  
179 remaining 40 targets were then binned into High, Medium and Low Competition groups  
180 based on quartiles (**S2 Figure C**) – the median *Microhomology Fraction* was  
181 significantly higher in the High Competition group than in the Low Competition group  
182 (0.300 vs 0.105,  $p = 0.011$ ; **S2 Figure D**).

183

### 184 **Competition Hypothesis Predicts New Winner-Takes-All Reagents**

185 Based on this Competition Hypothesis, we designed and analyzed the DSB repair  
186 outcomes of 20 Low Competition sgRNA targets across 9 genes (**S3 Table**). *Slope*  
187 *Values* smaller than -40 was used as the cut-off for Low Competition, as 3 out of 4  
188 previously designed zebrafish targets produced majority MMEJ outcomes in this range  
189 (**S1 Table and S1 Figure**). For initial assessments, we used TIDE (Tracking Indels by  
190 DEcomposition) analysis – a chromatogram analyzing tool that estimates proportions of  
191 length varying mutant alleles present in a pool of mixed alleles (22) – which revealed  
192 that 5 of these sgRNAs against 3 genes: *mtg1*, Mitochondrial GTPase 1; *tdgf1*,  
193 Teratocarcinoma-Derived Growth Factor 1; and *ttn.2*, titin (*ttn.2 #1*, *ttn.2 #2*, *ttn.2 N2B*  
194 *#1*) were in the “Winner-Take-All” class. These results were subsequently confirmed  
195 by subcloning analysis (**S3 Table**). Perturbation of *tdgf1* (alternatively known as *One-*  
196 *eyed Pinhead*) causes aberrant “fused eyes” morphology and cyclopia, as judged by  
197 reduced forebrain protrusion by 1 dpf(23) (**Fig 4B**). Aberrant head morphology alone  
198 was classified as Weak, whereas that in combination with varying degrees of forebrain  
199 protrusion was classified as Moderate or Strong phenotypes. RNP injections of  
200 CRISPR-Cas9 at the dose of 300 pg sgRNA and 660 pg Cas9 resulted in median

201 penetrance for Moderate and Severe morphology at 21.8% and 11.4% (**Fig 4B, S2**  
202 **Table**). The subcloning results were consistent with the noted phenotypic outcomes  
203 from this common 4bp deletion (**Fig 4A**).

204 We next explored whether these “Winner-Take-All” reagents could be useful for  
205 recapitulating a more subtle phenotype than the aberrant gross morphologies observed  
206 in the *tdgf1* mutants. Splice blockade at the N2B exon of *ttn.2* gene by a synthetic  
207 morpholino oligonucleotide was previously reported to reduce cardiac contractility by  
208 ~70% on 2 dpf(24), phenocopying the *pickwick*<sup>m171</sup> mutation(25). RNP delivery at the  
209 dose of 300 pg *ttn.2* N2B #2 sgRNA + 660 pg Cas9 resulted in reduction of the  
210 shortening fraction to a comparable degree (**Fig 5B**). Importantly, injecting RNP with *tyr*  
211 #2 sgRNA or sgRNA and Cas9 independently, at the same doses, did not affect the  
212 shortening fraction. Due to the high editing efficiency (**Fig 5A**), animals injected with  
213 these doses of CRISPR-Cas9 were not viable in post larval phases. For this reason,  
214 animals injected at the lower dose of 75 pg sgRNA + 165 pg Cas9 protein were raised  
215 to adulthood. Two F0 founders were successfully outcrossed to wild type zebrafish.  
216 Heterozygous offspring were identified using the dsDNA heteroduplex-cleaving  
217 Surveyor assay(26), and the transmission of the top predicted 5bp deletion allele was  
218 confirmed from both founders by subcloning analyses (**S3 Figure**).

219 We also designed an sgRNA against exon 13 of *ttn.2* (*ttn.2* #2 sgRNA), expected  
220 to produce a 12 bp deletion allele as a proof-of-principle for in-frame gene correction  
221 (**Fig 6A**). RNP delivery at the dose of 300 pg sgRNA + 660 pg Cas9 resulted in the  
222 induction of this 12 bp deletion allele at 72.7% of the resultant clones. While the injected  
223 animals presented with mild cardiac edema evident by 2 dpf (median rate: 50.0%; **Fig**

224 **6B, S2 Table**), unlike the N2B sgRNA #1 CRISPR-Cas9 injected animals, these were  
225 viable to adult age.

226

## 227 **Low Competition Plus Proximity of Microhomology Arms Strongly Predicts**

### 228 **Winner-Take-All Reagents: V2**

229 These data implicate the utility of “Winner-Take-All” class reagents for various  
230 applications that require precision gene editing. However, sgRNA design based on the  
231 Competition Hypothesis yielded only 5 Winner-Take-All reagents out of 20 that were  
232 tested (**S3 Table, S3 Note**). Although this represents an improvement over the initial  
233 approach relying solely on the *Microhomology Score*, we sought to further fine-tune the  
234 predictability for the Winner-Take-All targets. To this end, we pooled the results from all  
235 the programmable nucleases described above (**S1 and S3 Tables**) and seven Medium  
236 ~ High Competition sgRNAs designed as controls based on the Competition Hypothesis  
237 (**S4 Table**). In so doing, we noted that Winner-Take-All outcomes were observed only if  
238 the two arms of the microhomology of the top predicted MMEJ allele for a locus were  
239 separated by no more than 5 bp of intervening sequence. Thus, we identified a second  
240 parameter: high ratio ( $\geq 1.5$ ) of the *Pattern Scores* between the top and second  
241 predicted MMEJ alleles for a given locus (**Fig 7**). Seven out of eight reagents that  
242 satisfied both of these parameters were Winner-Take-All. Of the nine reagents that  
243 satisfied the first parameter but not the second, 2 were Winner-Take-All. All the other 30  
244 reagents that failed to meet the first parameter failed to induce the top predicted MMEJ  
245 allele strongly. Most importantly, all the failed cases, i.e., incorrect predictions according  
246 to the original Competition Hypothesis, can be explained using our revised approach

247 (Competition Hypothesis V2; **Fig 7C**). Version 2 also captured 3 Winner-Take-All  
248 reagents that would have been missed by the original Competition Hypothesis alone,  
249 and 1 Winner-Take-All reagent that would have been missed by the *Microhomology*  
250 *Score* alone. Finally, a similar trend was observed with the HeLa cell dataset (**S4**  
251 **Figure**). While the effect is not as dramatic as in zebrafish, this points to a possibly  
252 conserved mechanism for MMEJ activation in vertebrate organisms.

253

### 254 **Accessing the Winner-Take-All Algorithm via MENTHU (MMEJ kNockout Target** 255 **Heuristic Utility)**

256 The broad potential utility of this updated “Winner-Take-All” Algorithm for MMEJ  
257 prediction led us to develop a web-based automated analysis tool called MENTHU  
258 (<http://genesculpt.org/menthu/>). The software can also be downloaded and installed on  
259 a local computer ([www.github.com/Dobbs-Lab/menthu/](http://www.github.com/Dobbs-Lab/menthu/)). MENTHU accepts a user-  
260 specified DNA sequence and targeting scheme as input, and outputs recommended  
261 CRISPR sgRNA target sites that are predicted to result in Winner-Take-All type  
262 outcomes. We validated the accuracy and functionality of MENTHU against select  
263 gRNA sites used in this study using whole exonic sequences as inputs (**S5 Table**).  
264 Importantly, the software identified novel Winner-Take-All candidate loci against *surf1*  
265 and *tdgf1*, where only Group 3 gRNA loci had been found by previous methods.

266

### 267 **Discussion:**

268 To date, precision genome engineering is limited by the ability to predictably,  
269 efficiently, and reproducibly induce the identical sequence alterations in each and every

270 cell. Here, we demonstrate the feasibility and utility of creating allelic consistency by an  
271 MMEJ-centric approach for designing programmable nucleases. While the precise  
272 cellular components of the molecular machinery involved in MMEJ remain incompletely  
273 understood(8), we provide evidence that we can enrich for MMEJ events by strictly  
274 sequence-based queries.

275         Importantly, we demonstrate that MMEJ predominant repairs do not operate at  
276 the cost of overall mutagenic efficiency; median edit efficiency for Winner-Take-All  
277 reagents was 91.4%. As genetically unaltered wild type zebrafish were used throughout  
278 the study, we have no reason to believe that NHEJ should have failed at any tested loci.  
279 This is in contrast to the current perception that MMEJ is a back-up pathway to NHEJ(7,  
280 8, 16, 17, 27).

281         Based on the data presented here, we speculate that there is a reaction-limiting  
282 factor for MMEJ that is involved in identifying compatible microhomology pairs on both  
283 sides of the DNA double stranded break. In the case of abundantly available local  
284 microhomology pairs, sometimes this factor fails to localize to a single suitable pair, thus  
285 rejecting the MMEJ activation. As end-resection is required for MMEJ and not for NHEJ  
286 (9, 17, 18), this yet identified factor may be the deciding factor for committing DSB  
287 repair through one End Joining pathway to another. This view is similar to a recent  
288 report wherein CtIP/Artemis dependent limited end resection was a key trigger for a  
289 slow-kinetic Lig1/3 independent NHEJ event that frequently utilized Microhomology to  
290 repair a reporter plasmid(28). In our analysis, the primary driver of this decision making  
291 process is the proximity of 2 microhomology arms. Our present findings break down the  
292 key triggers for MMEJ activation into a simple 2-component math system with the aims

293 of making the MMEJ-centric approach to gene editing accessible. In addition, this study  
294 should inform future studies on the MMEJ pathway by enabling the identification of  
295 strongly MMEJ and strongly NHEJ loci under the same genetic context for in-depth  
296 comparative molecular analyses.

297         Successful deployment of the Winner-Take-All reagents makes it possible to  
298 directly dictate the reading frame or to do in-frame gene manipulations on endogenous  
299 targets. Even assuming a somewhat modest outcome of 50% edit efficiency in which  
300 50% of the mutant allele pool is of the desirable allele, more than 10% of the cell  
301 population will be homozygous for this desired allele. Conversely, many real-life gene  
302 editing applications would require only one of the diploid copies to be corrected. In  
303 these settings under the same assumptions, just 11 viable cells are needed to achieve  
304 95% confidence for establishing the right clone, bringing the idea of this kind of  
305 molecular surgery closer to reality.

306         Our present study expands upon the current state-of-art for MMEJ activation and  
307 demonstrates the ability to prospectively design robustly active Winner-Take--All  
308 reagents *in-vivo*. We also provide evidence that this 2-component system to identify the  
309 Winner-Take-All loci may be broadly applicable beyond zebrafish. To make this  
310 algorithm more accessible, we developed the web-based server, MENTHU;  
311 <http://genesculpt.org/menthu/>). MENTHU should enable testing the hypothesis that our  
312 present findings are generalizable in other biological systems. In addition, MMEJ-based  
313 loci are inherently restricted to genomic locations that leverage endogenous sequence  
314 contexts. Consequently, the requirement for a GG dinucleotide for SpCas9 restricts the  
315 potential MMEJ sites. However, active investigations are underway to accommodate



316 alternative or more lax PAM requirements. One such example is a recent variant of  
317 Cas9 (xCas) that may function efficiently on an NG PAM(29). However, MENTHU  
318 allows users to flexibly define any PAM sequence and the cut site (in nts from PAM) to  
319 accommodate potential future variants of the CRISPR system.

320 Finally, we provide strong evidence to support the utility of the MMEJ-centric  
321 approach beyond correlating phenotype-genotype in F0 animals. We envision this  
322 approach to be useful for: 1) studying the effects of homozygous gene knock-out in  
323 culture cells (as opposed to more common, compound heterozygous loss-of-function  
324 cell lines), 2) rapid small molecule screening in F0 animals as a complimentary  
325 approach to studying in germline mutant animals, 3) globally sharing and reproducing  
326 gene knock-out cell and animal lines, and finally, 4) human gene therapy.

327 **Materials and Methods:**

328 Microhomology arms: For the purpose of this study, microhomology is defined as any  
329 endogenous direct sequence repeats of  $\geq 3$  bp surrounding a DSB site.  $\leq 2$ bp direct  
330 sequence repeats were not considered sufficient substrates of MMEJ activation based  
331 on our initial analyses of the DSB repair outcomes by previously designed  
332 programmable nucleases. Correlation for *Microhomology Fraction* vs the *Slope Value*  
333 was tangentially stronger when only  $\geq 3$  bp arms were considered ( $r^2 = 0.382$  vs  $r^2 =$   
334  $0.353$ ; **S1 Figure**) in zebrafish, whereas the correlation was lost when 2bp arms were  
335 considered in HeLa cells ( $r^2 = 0.339$  vs  $r^2 = 0.034$ ; **S2 Figure**).

336

337 Zebrafish Husbandry: All zebrafish (*Danio rerio*) were maintained in accordance with  
338 protocols approved by the Institutional Animal Care and Use Committee at Mayo Clinic.  
339 Zebrafish pairwise breeding was set up one day before microinjections and dividers  
340 were removed the following morning. Following microinjections, the fertilized eggs were  
341 transferred to Petri dishes with E3 media [5mM NaCl, 0.17mM KCL, 0.33mM CaCl, and  
342 0.33mM MgSO<sub>4</sub> at pH 7.4] and incubated at 28.5°C. All subsequent assays were  
343 conducted on fish less than 3 dpf, with the exception of assessing for germline  
344 transmission. In this case, injected founders were raised to adulthood per the standard  
345 zebrafish husbandry protocol.

346

347 DNA Oligonucleotide Preparation: All of the oligonucleotides used for this study were  
348 purchased from IDT (San Jose, CA). Upon arrival, they were reconstituted into 100 $\mu$ M  
349 suspensions in 1x TE and stored at -20°C until use.

350

351 *sgRNA Expression Vector synthesis*: pT7-gRNA was a gift from Wenbiao Chen  
352 (Addgene plasmid # 46759). Given that the minimum requirement for the T7 promoter is  
353 a single 5' G, the GG start on this vector was mutagenized to accommodate GA, GC,  
354 GT starts, using Forward and Reverse primers given (**S5 Table**). Platinum Pfx DNA  
355 Polymerase (Invitrogen 11708013. Carlsbad, CA) was used for 20 cycles of PCR  
356 amplification with the T<sub>m</sub> of 60 °C and extension time of 3 minutes. DpnI (NEB R0176.  
357 Ipswich, MA) was subsequently added to reaction prior to transforming DH5α cells. The  
358 target sequence was cloned in as previously described, with the exception of  
359 conducting oligo annealing and T4 ligation (NEB M0202. Ipswich, MA) in 2 separate  
360 steps. In each case, transformed cells were cultured with Carbenicillin, and plasmids  
361 were purified with Plasmid Mini Kit (Qiagen 12123. Hilden, Germany).

362

363 *TALEN synthesis*: TALEN constructs were generated using the FusX kit (Addgene #  
364 1000000063) as previously described(30). In short, RCIscrip-GoldyTALEN was  
365 linearized with BsmBI (NEB R0580. Ipswich, MA) along with 6 triplet RVD (Repeat-  
366 Variable Diresidue) plasmids. Subsequently, they were ligated together in one reaction  
367 by a modified Golden-Gate Assembly. Blue-White colony screening with X-Gal/IPTG,  
368 colony PCR and finally pDNA sequencing were done to ascertain the correct assembly.

369

370 *In-vitro Transcription and RNA preparation*: pT3TS-nCas9n (a gift from Wenbiao Chen:  
371 Addgene plasmid # 46757) was linearized with XbaI (NEB R0145. Ipswich, MA),  
372 whereas TALEN constructs were linearized with SacI-HF (NEB R3156) and sgRNA

373 vector with BamHI-HF (NEB R3136. Ipswich, MA). Tyr sgRNA #2 – a construct made in  
374 the Essner Lab – was linearized with HindIII (NEB R0104. Ipswich, MA). RNA was  
375 made using T3 mMessage mMachine kit (Ambion AM1348. Foster City, CA) or HiScribe  
376 T7 High Yield RNA synthesis kit (NEB E2040. Ipswich, MA) according to manufacturer's  
377 protocols with the addition of RNA Secure to the reaction (Ambion AM7010. Foster City,  
378 CA). To purify RNA, phenol-chloroform extraction was performed using Acid Phenol,  
379 Chloroform, and MaXtract High Density Tubes (Qiagen 129046. Hilden, Germany). RNA  
380 was then precipitated with Isopropanol at -20 °C, pelleted, air dried and resuspended  
381 into nuclease free water. The quality and quantity of RNA were ascertained by using a  
382 Nanodrop spectrophotometer and running aliquot on agarose gel. Each batch of RNA  
383 was aliquoted into small single use tubes and stored at -80 °C until the morning of  
384 microinjections.

385

386 *CRISPR-Cas9 RNP preparation for microinjections:* sgRNA was thawed on ice in the  
387 morning of microinjections. This was then diluted to the concentration of 300 ng/μL in  
388 Duplex Buffer [100 mM KCH<sub>3</sub>COO, 30 mM HEPES at pH 7.5]. Appropriate folding of  
389 sgRNA was induced by heating it to 95 °C for 5 minutes and gradually cooling the  
390 solution to room temperature. Equal volumes of sgRNA and 0.66 mg/mL Alt-R S.p.  
391 Cas9 Nuclease 3NLS (IDT 1074181. San Jose, CA) in Cas9 Working Buffer [20 mM  
392 HEPES, 100 mM NaCl, 5 mM MgCl<sub>2</sub>, 0.1 mM EDTA at pH 6.5] were mixed and  
393 incubated at 37 °C for 10 minutes. RNP solutions were subsequently kept on ice until  
394 immediately before use.

395

396 *TALEN and CRISPR-Cas9 RNA preparation for microinjections:* RNA was thawed on  
397 ice in the morning of microinjections. TALEN mRNA was diluted to working  
398 concentrations in the range of 12.5 ng/ $\mu$ L to 100 ng/ $\mu$ L in Danieau solution [58 mM  
399 NaCl, 0.7mM KCl, 0.4 mM MgSO<sub>4</sub>, 0.6 mM Ca(NO<sub>3</sub>)<sub>2</sub>, 5.0 mM HEPES at pH 7.6].  
400 sgRNA and nCas9n mRNA were mixed and diluted to the final concentrations of 150  
401 ng/ $\mu$ L and 100 ng/ $\mu$ L, respectively, in Danieau solution. These were all kept on wet ice  
402 until immediately before use.

403  
404 *Microinjections:* Microinjections were carried out as previously described(31). In short,  
405 1-cell stage fertilized embryos were harvested and aligned on an agarose plate with E3  
406 media. In the case of CRISPR-Cas9 reagents, either 1 or 2 nL was delivered to the cell.  
407 In the case of TALEN reagents, 1 ~ 3 nL was delivered to the yolk mass. They were  
408 then transferred to Petri dishes in E3 media for incubation at 28.5 °C. Dead and/or  
409 nonviable embryos were counted and removed each subsequent morning.

410  
411 *Phenotype Scoring:* Each experiment was conducted in at least a technical triplicate  
412 and a biological duplicate. Detailed outcomes are provided in **S4 Table**. Gross  
413 phenotypes were scored visually on either 1 dpf or 2 dpf using a standard dissecting  
414 microscope. Subsequently, representative pictures were taken with Lightsheet Z.1  
415 (Zeiss 2583000135. Oberkochen, Germany). Shortening Fractions were scored as  
416 previously reported. In short, live 2 dpf larvae were immobilized and positioned in 3%  
417 methylcellulose. An Amscope camera (MU1403. Irvine, CA) mounted on a Leica  
418 Microscope (M165. Wetzlar, Germany) was used to capture a 15 second clip of the

419 beating heart at 66 fps. These clips were subsequently used to measure the distance of  
420 the long axis along the ventricle at maximum dilation and maximum contraction using  
421 ImageJ software(32). Shortening Fraction was calculated as below:

$$\text{Shortening Fraction} = 100 * \left(1 - \frac{\text{Distance at Maximal Shortening}}{\text{Distance at Maximum Dilation}}\right)$$

422 Shortening Fractions from 5 cycles were averaged for each animal.

423

424 DNA extraction and assessing mutagenic outcomes: Typically, 8 uninjected wildtype  
425 fish and 8 injected fish were randomly collected without prior screening for phenotype.  
426 Chorion was predigested with 1 mg/mL Pronase at room temperature as needed. 1 ~ 3  
427 dpf animals were then sacrificed for individual DNA extractions in 100mM NaOH for 15  
428 minutes at 95 °C. Equal volumes of DNA from the same condition were then mixed and  
429 used as templates for PCR with either MyTaq (Bioline BIO-21108. London, UK),  
430 Phusion (NEB M0530. Ipswich, MA), or KOD (EMD Millipore 71085. Burlington, MA)  
431 polymerases per manufacturer's protocols. The PCR amplicon was resolved on agarose  
432 gel, gel extracted with either Monarch DNA Gel Extraction Kit (NEB T1020. Ipswich,  
433 MA) or QiaEx II Gel Extraction Kit (Qiagen 20021. Hilden, Germany), and subsequently  
434 sent out for sequencing. The chromatograms from both uninjected and injected  
435 amplicons were used for TIDE analysis(22). Alternatively, purified amplicons were used  
436 for subcloning analysis with either Topo-TA Cloning Kit (Thermo Fisher Scientific  
437 451641. Waltham, MA) or StrataClone PCR Cloning Kit (Agilent 240205. Santa Clara,  
438 CA) per manufacturer's protocols. Resultant white to pale blue colonies by Blue-White  
439 screening were subjected to colony PCR with M13F and R primers, using MyTaq  
440 polymerase. Once successful amplification was confirmed on agarose gel, these

441 amplicons were sent out for sequencing either with M13F, M13R or endogenous gene  
442 target primers.

443

444 *Germline Transmission for 5bp deletion generated by N2B sgRNA #1*: RNP containing

445 N2B sgRNA #1 was prepared at 4x diluted dose as described above. Following

446 microinjections, viable fish were raised to sexual maturity. Both F0 founders we

447 attempted to outcross successfully mated and produced viable embryos. DNA was

448 extracted from all viable embryos on 1 dpf, and individual DNA was used as template

449 for PCR amplification using MyTaq Polymerase. Once the thermocycling ran to

450 completion, the amplicons were melted by heating to 95 °C and re-annealed by a

451 gradual step-wise cooling. Surveyor assay(26) was conducted per the manufacturer's

452 protocol (IDT 706025. San Jose, CA), and the results were analyzed by resolving the

453 post-digest amplicons on agarose gel. Amplicons from 4 heterozygous offspring each

454 were subcloned, and 5 colonies each were sent for Sanger Sequencing to confirm

455 successful transmission of the 5bp deletion allele.

456

457 *MENTHU*:

458 We developed a software tool, MENTHU (MMEJ kNockout Target Heuristic Utility), to

459 automate calculations required to implement the 2-component Winner-Take-All strategy:

460 1) identification of top predicted microhomology arms separated by  $\leq 5$  bp of intervening

461 sequence; 2) identification of "low competition" target sites (i.e., with a #1-ranked to #2-

462 ranked Pattern Score ratio  $\geq 1.5$ . We designed MENTHU to first compute two of the

463 same sequence-based parameters (*Pattern Score and Microhomology Score*) used in

464 the algorithm of Bae *et al.*, (which are computed online by the RGEN online tool,  
465 <http://www.rgenome.net>), by re-implementing and modifying the original Python source  
466 code provided in Supplemental Figure 3 (14) in R. The MENTHU webserver operates  
467 under R(33) version 3.4.1 and RShiny (34) v1.0.5. The MENTHU code was built through  
468 RStudio(35) v1.1.442. Details regarding specific R package versions, complete  
469 documentation and a full downloadable version of MENTHU for local installation are  
470 provided at [www.github.com/Dobbs-Lab/menthu/](http://www.github.com/Dobbs-Lab/menthu/). MENTHU v2.0 can be freely  
471 accessed online at <http://genesculpt.org/menthu/>.

472

473 *Statistical Analyses:* All of the statistical analyses were carried out using JMP software  
474 (SAS Institute. Cary, NC). In all instances, p-values were calculated assuming non-  
475 Gaussian Distributions. Wilcoxon Each Pair calculation was used for multiple group  
476 comparisons with adjusted p-values.

477



478 **Acknowledgements:**

479 Funding: NIH OD020166; NIH UL1TR002377; NIH GM63904; P30DK090728; AHA  
480 16PRE30470004; Mayo MSTP; Mayo Foundation; and gift from Marriott Foundation.

481 We would like to acknowledge Melissa McNulty for TALEN synthesis and data curation,  
482 Mark Urban for zebrafish husbandry and help with microinjections, Patrick Blackburn for  
483 designing *chrd* #1 sgRNA, Mayo Clinic Zebrafish Facility and staff for their support. We  
484 also thank the Jin-Soo Kim group for developing the Microhomology-Predictor CRISPR  
485 RGEN Tool, for making source code freely available, and for sharing the deep  
486 sequencing output from their HeLa cell experiments. We thank Wesley A Wierson and  
487 Jeffrey J Essner for the tyr gRNA, and the research groups of Dr. Essner and Dr Maura  
488 McGrail for valuable discussions and feedback and for MENTHU server testing, and  
489 Carolyn Lawrence-Dill and her group, especially Darwin Campbell, for valuable  
490 discussions and hosting services for MENTHU.

491

492                   References Cited (PLOS format – ICMJE or Vancouver style)

- 493           1.       Campbell JM, Hartjes KA, Nelson TJ, Xu X, Ekker SC. New and TALENTed genome engineering  
494 toolbox. *Circ Res*. 2013;113(5):571-87.
- 495           2.       Doudna JA, Charpentier E. Genome editing. The new frontier of genome engineering with  
496 CRISPR-Cas9. *Science*. 2014;346(6213):1258096.
- 497           3.       Lieber MR. The mechanism of double-strand DNA break repair by the nonhomologous DNA end-  
498 joining pathway. *Annu Rev Biochem*. 2010;79:181-211.
- 499           4.       Carroll D. Genome engineering with targetable nucleases. *Annu Rev Biochem*. 2014;83:409-39.
- 500           5.       Jao LE, Wente SR, Chen W. Efficient multiplex biallelic zebrafish genome editing using a CRISPR  
501 nuclease system. *Proc Natl Acad Sci U S A*. 2013;110(34):13904-9.
- 502           6.       Ata H, Clark KJ, Ekker SC. The zebrafish genome editing toolkit. *Methods Cell Biol*. 2016;135:149-  
503 70.
- 504           7.       Boulton SJ, Jackson SP. Identification of a *Saccharomyces cerevisiae* Ku80 homologue: roles in  
505 DNA double strand break rejoining and in telomeric maintenance. *Nucleic Acids Res*. 1996;24(23):4639-  
506 48.
- 507           8.       Seol JH, Shim EY, Lee SE. Microhomology-mediated end joining: Good, bad and ugly. *Mutat Res*.  
508 2017.
- 509           9.       Sharma S, Javadekar SM, Pandey M, Srivastava M, Kumari R, Raghavan SC. Homology and  
510 enzymatic requirements of microhomology-dependent alternative end joining. *Cell Death Dis*.  
511 2015;6:e1697.
- 512           10.      Kent T, Chandramouly G, McDevitt SM, Ozdemir AY, Pomerantz RT. Mechanism of  
513 microhomology-mediated end-joining promoted by human DNA polymerase theta. *Nat Struct Mol Biol*.  
514 2015;22(3):230-7.
- 515           11.      Nakade S, Tsubota T, Sakane Y, Kume S, Sakamoto N, Obara M, et al. Microhomology-mediated  
516 end-joining-dependent integration of donor DNA in cells and animals using TALENs and CRISPR/Cas9.  
517 *Nat Commun*. 2014;5:5560.
- 518           12.      Yao X, Wang X, Liu J, Hu X, Shi L, Shen X, et al. CRISPR/Cas9 - Mediated Precise Targeted  
519 Integration In Vivo Using a Double Cut Donor with Short Homology Arms. *EBioMedicine*. 2017;20:19-26.
- 520           13.      Hisano Y, Sakuma T, Nakade S, Ohga R, Ota S, Okamoto H, et al. Precise in-frame integration of  
521 exogenous DNA mediated by CRISPR/Cas9 system in zebrafish. *Sci Rep*. 2015;5:8841.
- 522           14.      Bae S, Kweon J, Kim HS, Kim JS. Microhomology-based choice of Cas9 nuclease target sites. *Nat*  
523 *Methods*. 2014;11(7):705-6.
- 524           15.      Qi Z, Redding S, Lee JY, Gibb B, Kwon Y, Niu H, et al. DNA sequence alignment by microhomology  
525 sampling during homologous recombination. *Cell*. 2015;160(5):856-69.
- 526           16.      Corneo B, Wendland RL, Deriano L, Cui X, Klein IA, Wong SY, et al. Rag mutations reveal robust  
527 alternative end joining. *Nature*. 2007;449(7161):483-6.
- 528           17.      Truong LN, Li Y, Shi LZ, Hwang PY, He J, Wang H, et al. Microhomology-mediated End Joining and  
529 Homologous Recombination share the initial end resection step to repair DNA double-strand breaks in  
530 mammalian cells. *Proc Natl Acad Sci U S A*. 2013;110(19):7720-5.
- 531           18.      Zha S, Boboila C, Alt FW. Mre11: roles in DNA repair beyond homologous recombination. *Nat*  
532 *Struct Mol Biol*. 2009;16(8):798-800.
- 533           19.      He MD, Zhang FH, Wang HL, Wang HP, Zhu ZY, Sun YH. Efficient ligase 3-dependent  
534 microhomology-mediated end joining repair of DNA double-strand breaks in zebrafish embryos. *Mutat*  
535 *Res*. 2015;780:86-96.
- 536           20.      Schulte-Merker S, Lee KJ, McMahon AP, Hammerschmidt M. The zebrafish organizer requires  
537 chordino. *Nature*. 1997;387(6636):862-3.

- 538 21. Page-McCaw PS, Chung SC, Muto A, Roeser T, Staub W, Finger-Baier KC, et al. Retinal network  
539 adaptation to bright light requires tyrosinase. *Nat Neurosci.* 2004;7(12):1329-36.
- 540 22. Brinkman EK, Chen T, Amendola M, van Steensel B. Easy quantitative assessment of genome  
541 editing by sequence trace decomposition. *Nucleic Acids Res.* 2014;42(22):e168.
- 542 23. Zhang J, Talbot WS, Schier AF. Positional cloning identifies zebrafish one-eyed pinhead as a  
543 permissive EGF-related ligand required during gastrulation. *Cell.* 1998;92(2):241-51.
- 544 24. Seeley M, Huang W, Chen Z, Wolff WO, Lin X, Xu X. Depletion of zebrafish titin reduces cardiac  
545 contractility by disrupting the assembly of Z-discs and A-bands. *Circ Res.* 2007;100(2):238-45.
- 546 25. Xu X, Meiler SE, Zhong TP, Mohideen M, Crossley DA, Burggren WW, et al. Cardiomyopathy in  
547 zebrafish due to mutation in an alternatively spliced exon of titin. *Nat Genet.* 2002;30(2):205-9.
- 548 26. Vouillot L, Thelie A, Pollet N. Comparison of T7E1 and surveyor mismatch cleavage assays to  
549 detect mutations triggered by engineered nucleases. *G3 (Bethesda).* 2015;5(3):407-15.
- 550 27. Decottignies A. Microhomology-mediated end joining in fission yeast is repressed by pku70 and  
551 relies on genes involved in homologous recombination. *Genetics.* 2007;176(3):1403-15.
- 552 28. Biehs R, Steinlage M, Barton O, Juhasz S, Kunzel J, Spies J, et al. DNA Double-Strand Break  
553 Resection Occurs during Non-homologous End Joining in G1 but Is Distinct from Resection during  
554 Homologous Recombination. *Mol Cell.* 2017;65(4):671-84 e5.
- 555 29. Hu JH, Miller SM, Geurts MH, Tang W, Chen L, Sun N, et al. Evolved Cas9 variants with broad  
556 PAM compatibility and high DNA specificity. *Nature.* 2018.
- 557 30. Ma AC, McNulty MS, Poshusta TL, Campbell JM, Martinez-Galvez G, Argue DP, et al. FusX: A  
558 Rapid One-Step Transcription Activator-Like Effector Assembly System for Genome Science. *Hum Gene  
559 Ther.* 2016;27(6):451-63.
- 560 31. Bill BR, Petzold AM, Clark KJ, Schimmenti LA, Ekker SC. A primer for morpholino use in zebrafish.  
561 *Zebrafish.* 2009;6(1):69-77.
- 562 32. Schneider CA, Rasband WS, Eliceiri KW. NIH Image to ImageJ: 25 years of image analysis. *Nat  
563 Methods.* 2012;9(7):671-5.
- 564 33. R Core Team. R: A language and environment for statistical computing.: R Foundation for  
565 Statistical Computing; 2016.
- 566 34. Chang W CJ, Allaire JJ, Xie Y, and McPherson J. shiny: Web Application Framework for R. R  
567 package version 1.0.5. 2017.
- 568 35. R Studio Team. RStudio: Integrated Development for R. 2016.

569

## 570 **Figure Captions:**

571 **Fig 1 – MMEJ is a unique DSB repair pathway that results in highly efficient and**  
572 **highly stereotyped mutagenesis.**

573 DSB repair generally begins with end resections to varying degrees. Once the ends are  
574 processed, end joining in NHEJ often occurs between incompatible ends, producing  
575 unpredictable and heterogeneous mutant alleles. In contrast, MMEJ uses region of  
576 sequence microhomology flanking a DSB to temporarily appose the two strands. A  
577 polymerase will then elongate DNA from the homology arms in a templated fashion,

578 resulting in predictable mutagenesis. Although both MMEJ and NHEJ can lead to high  
579 efficiency, biallelic mutagenesis of a target gene, HDR is usually a low-efficiency,  
580 monoallelic process. This is because DSB is repaired by recruiting homologous DNA as  
581 a template for repair. Of the HDR pathways, HR results in a high-fidelity repair, usually  
582 confined to late S ~ G2 phase because of the proximity requirement of the two  
583 chromosomes. Rectangular boxes represent homology arms of varying lengths  
584 indicated above them.

585

586 **Fig 2 Winner-Take-All TALEN reagent can be used to recapitulate previously**  
587 **reported loss-of-*chrd*-function phenotype in 1 dpf F0, injected larvae**

588 **A** *Top* – Wildtype *chrd* sequence with TALEN binding sites annotated in teal. The dotted  
589 red boxes are MH arms predicted to be used most frequently. Raw sequence alignment  
590 of the whole PCR amplicon demonstrates that the majority of reads are the expected  
591 7bp deletion allele. *Bottom* – summary data from subcloning analyses. 50% of the  
592 mutant allele recovered were of the predicted MH allele. **B** Previously reported *chrd*  
593 loss-of-function phenotype was successfully recapitulated using this TALEN pair.  
594 Phenotype severity was graded by the degree of ICM expansion in the tail and by the  
595 reduced head size by 1 dpf. Box plot demonstrating phenotypic penetrance is provided.  
596 N = 3 biological and technical replicates. At least 29 injected animals were scored in  
597 each experiment.

598

599 **Fig 3 Winner-Take-All sgRNA against *tyr* can be used to recapitulate loss-of-**  
600 **melanophore phenotype in 2 dpf, injected F0 larvae injected**

601 **A** *Top* – Wildtype *tyr* sequence with the #2 sgRNA target site annotated in green. The  
602 dotted red boxes are MH arms predicted to be used most frequently. Raw sequence  
603 alignment of the whole PCR amplicon demonstrates that the majority of reads are the  
604 expected 4bp deletion allele. *Bottom* – summary data from subcloning analyses. 88% of  
605 the mutant allele recovered were of the predicted MH allele. **B** Previously reported *tyr*  
606 loss-of-function phenotype was successfully recapitulated using this CRISPR-Cas9.  
607 Phenotype severity was graded by the loss of retinal pigmentation. Partial loss of retinal  
608 pigmentation was considered a Weak phenotype, whereas complete loss of  
609 pigmentation in one or both eyes were considered Moderate and Strong phenotypes,  
610 respectively. Box plot demonstrating phenotypic penetrance is provided. N = 3 biological  
611 and technical replicates. At least 12 injected animals were scored in each experiment.

612

613 **Fig 4 Prospectively designed Winner-Take-All reagent against *tdgf1* can be used**  
614 **to reproduce gross developmental defect in 1 dpf, injected F0 larvae**

615 **A** *Top* – Wildtype *tdgf1* sequence with sgRNA target site annotated in orange. The  
616 dotted red boxes are MH arms predicted to be used most frequently. Raw sequence  
617 alignment of the whole PCR amplicon demonstrates that the majority of reads are the  
618 expected 4bp deletion allele. *Bottom* – summary data from subcloning analyses. 72% of  
619 the mutant allele recovered were of the predicted MH allele. **B** Previously reported *tdgf1*  
620 loss-of-function phenotype was successfully recapitulated using this CRISPR-Cas9.  
621 Phenotype severity was graded by the “pinhead” morphology and cyclopia. Pinhead  
622 morphology alone was classified as Weak, whereas Moderate and Strong phenotypes  
623 also presented with varying degrees of cyclopia judged by the distance of forebrain

624 protrusion. In the Strong class, the forebrain does not separate the eyes, and they are  
625 fused together. Box plot demonstrating phenotypic penetrance is provided. N = 4 with 3  
626 biological and 4 technical replicates. At least 42 injected animals were scored in each  
627 experiment.

628

629 **Fig 5 Winner-Take-All reagent against *ttn.2* N2B results in specific reduction of**  
630 **shortening fraction in 2 dpf F0 zebrafish**

631 **A** *Top* – Wildtype *ttn.2* sequence at the N2B exon with sgRNA target site annotated in  
632 red. The dotted red boxes are MH arms predicted to be used most frequently. Raw  
633 sequence alignment of the whole PCR amplicon demonstrates that the majority of reads  
634 are the expected 5bp deletion allele. *Bottom* – summary data from subcloning analyses.  
635 86% of the mutant allele recovered were of the predicted MH allele. **B** Previously  
636 reported *pickwick* phenotype was successfully recapitulated using this CRISPR-Cas9. 2  
637 dpf zebrafish were immobilized in 3% methylcellulose for live recording of cardiac  
638 functions. Whereas injections with Cas9 only (660pg), N2B #1 sgRNA only (300pg), or  
639 *tyr* #2 sgRNA RNP (300pg sgRNA + 660pg Cas9) did not result in changes in  
640 shortening fraction at this age, RNP injection containing N2B #1 sgRNA (300pg sgRNA  
641 + 660pg Cas9) resulted in a specific reduction in shortening fraction by 65%. N > 3  
642 biological and technical replicates. At least 5 injected animals were scored in each  
643 experiment. P-values calculated using the Wilcoxon Each Pair Calculation (adjusted for  
644 multiple comparisons)

645

646 **Fig 6 Winner-Take-All reagent can be used for in-frame gene alteration**

647 **A** *Top* – Wildtype *ttn.2* sequence with sgRNA target site annotated in red. The dotted  
648 red boxes are MH arms predicted to be used most frequently. Raw sequence alignment  
649 of the whole PCR amplicon demonstrates that the majority of reads are the expected  
650 12bp deletion allele. *Bottom* – summary data from subcloning analyses. 73% of the  
651 mutant allele recovered were of the predicted MH allele. **B** 2 dpf zebrafish larvae  
652 injected with *ttn.2* #2 sgRNA RNP (300pg sgRNA + 660pg Cas9) grossly appear normal  
653 with the exception of mild cardiac edema. Median penetrance was 50%. N = 3 biological  
654 and technical replicates. At least 9 injected animals were scored in each experiment.  
655

## 656 **Fig 7 Competition Hypothesis Version 2**

657 **A** Outlier plot summarizing repair outcomes from 47 genomic targets using TALEN and  
658 CRISPR-Cas9. Close proximity of 2 MH arms (Groups 3 and 4) appears to be the  
659 primary determinant for generating Winner-Take-All type outcomes as no target from  
660 Groups 1 and 2 had Top MH Fraction exceeding 0.5. When the top predicted allele had  
661 at least 50% higher Pattern Score than the second predicted allele (Groups 2 and 4), it  
662 was a strong indicator for inducing MMEJ-class repairs. **B** *Top* Definition for each of the  
663 4 groups used in Panel **A**. Each and every zebrafish genomic locus was segmented into  
664 these categories. Pattern scores were derived using RGEN online tool. *Bottom* P-  
665 values calculated using the Wilcoxon Each Pair Calculation (adjusted for multiple  
666 comparisons). **C** Graphical representation of each group detailed in Panel **A**. Groups 1  
667 and 2 are prone to activate NHEJ-type outcomes, presumably because the yet-  
668 unidentified MMEJ factor fails to localize to suitable microhomology arm pairs, limited by  
669 how far apart the arms are. Group 4 is most suitable for strong MMEJ activation

670 because it satisfies the proximity requirement AND the relative strength requirement.

671 The latter may aid in the kinetics of the yet-unidentified MMEJ factor binding to the  
672 microhomology arms. Our data suggest that Group 3 is an intermediate group in terms  
673 of MMEJ activation. Perhaps extragenetic factors, such as cell cycle and epigenetic  
674 status may determine how favorable the loci are for MMEJ inductions.

675

676 **S1 Figure Overabundance of Microhomology arms is a negative predictor of**  
677 **MMEJ activation in zebrafish**

678 **A** Box plot showing the distribution of *Slope Values* across 19 zebrafish genomic  
679 targets. **B** Scatter plot of 3bp MH Fraction against *Slope Value*. Linear fit with 95%  
680 Confidence Interval (shade) is shown.  $r^2 = 0.382$ ,  $p = 0.0048$ . **C** Scatter plot of 2bp MH  
681 Fraction against *Slope Value*. Linear fit with 95% Confidence Interval (shade) is shown.  
682  $r^2 = 0.353$ ,  $p = 0.0073$  Shade is 95% CI. *Pattern Scores* and *Microhomology Scores*  
683 were derived using RGEN online tool (<http://www.rgenome.net>).

684

685 **S2 Figure Overabundance of Microhomology arms is a negative preidictor of**  
686 **MMEJ activation in HeLa cell**

687 **A** Scatter plot of 3bp MH Fraction against *Slope Value* from the first 50, alphabetically  
688 sorted HeLa cell targets. Linear fit with 95% Confidence Interval (shade) is shown.  $r^2 =$   
689  $0.339$ ,  $p = 0.0001$ . **B** Scatter plot of 2bp MH Fraction against *Slope Value* from the first  
690 50, alphabetically sorted HeLa cell targets. Linear fit with 95% Confidence Interval  
691 (shade) is shown.  $r^2 = 0.034$ ,  $p = 0.2644$ . **C** Box plot showing the distribution of *Slope*  
692 *Values* across the first, alphabetically sorted HeLa cell targets. **D** Box plot showing the



693 3bp MH Fractions for High and Low competition sites amongst the remaining 40 HeLa  
694 cell targets.  $p = 0.011$ . Targets with  $< 20\%$  overall edit efficiency were excluded in all  
695 panels. *Pattern Scores* and *Microhomology Scores* were derived using RGEN online  
696 tool (<http://www.rgenome.net>).

697

698 **S3 Figure Microhomology allele generated by *ttn.2* N2B sgRNA #1 is germline**  
699 **transmitted**

700 Agarose gel showing PCR amplicon post Surveyor digest. 752bp band is the whole  
701 amplicon. The expected bands due to mutations at the CRISPR site are denoted by  
702 yellow arrowheads. The red asterisk denotes positive digest band due to a background  
703 T -> A SNP at position 389 from the 5' end of the amplicon. Heterozygous animals are  
704 bolded and underlined. Genotypes of the first 4 heterozygous progenies from each  
705 founder were ascertained by subcloning analyses.

706

707 **S4 Fig Fitting Competition Hypothesis Version using HeLa cell dataset**

708 Outlier plot summarizing repair outcomes from 90 genomic targets using CRISPR-Cas9.  
709 Similar to the findings in zebrafish, close proximity of 2 MH arms (Groups 3 and 4)  
710 appears to be the primary determinant for utilizing this MH pair efficiently. When the top  
711 predicted allele had at least 50% higher *Pattern Score* than the second predicted allele  
712 (Groups 2 and 4), median Top MH Fractions trended higher compared to Group 1 and  
713 3, respectively. P-values calculated using the Wilcoxon Each Pair Calculation (adjusted  
714 for multiple comparisons). Targets with  $< 20\%$  overall edit efficiency were excluded from

715 analysis. *Pattern Scores* and *Microhomology Scores* were derived using RGEN online  
716 tool (<http://www.rgenome.net>).

717

### 718 **S1 Table**

719 List and summary mutagenic outcomes of TALEN and CRISPR-Cas9 reagents that  
720 were designed primarily using the Bae *et al.* algorithm(14). Underlined & italicized bases  
721 in sgRNA sequence denote mismatched bases due to the promoter requirement.

722 *Pattern Scores* and *Microhomology Scores* were derived using RGEN online tool  
723 (<http://www.rgenome.net>).

724 MH: Microhomology, SC: Subcloning

725 \*Reagents prospectively designed according to Bae *et al.* algorithm(14).

726 †No raw sequencing data were available. However, the outcome had been compiled  
727 into a table prior to conception of this study.

728 ‡Injected with sgRNA and Cas9 mRNA (150 pg and 100 pg, respectively)

729 ^gift from Wenbiao Chen (Addene # 46761).

730

### 731 **S2 Table**

732 Summary gross phenotyping outcomes from Winner-Take-All reagent injections. For  
733 *tdgf1*, Experiments 1a and 1b correspond to technical replicates using WT 1 as  
734 reference, uninjected control. *chrd* and *tdgf1* phenotypes were scored on 1 dpf, whereas  
735 *tyr*, *ttn.2* N2B, *ttn.2* phenotypes were scored on 2 dpf.

736

### 737 **S3 Table**

738 List and summary sequence outcomes of Low Competition sgRNA that were designed  
739 around the Competition Hypothesis. Underlined & Italicized bases in gRNA sequence  
740 denote mismatched bases due to the promoter requirement. *Pattern Scores* and  
741 *Microhomology Scores* were derived using RGEN online tool (<http://www.rgenome.net>).  
742 MH: Microhomology, SC: Subcloning, TIDE: Tracking Indels by DEcomposition.  
743 † injected RNP at the dose of 115 pg sgRNA and 245 pg Cas9 due to poor viability at  
744 higher doses

745

#### 746 **S4 Table**

747 List and summary sequence outcomes of Medium ~ High Competition sgRNA that were  
748 designed around the Competition Hypothesis. Underlined & Italicized bases in sgRNA  
749 sequence denote mismatched bases due to the promoter requirement. *Pattern Scores*  
750 and *Microhomology Scores* were derived using RGEN online tool  
751 (<http://www.rgenome.net>).  
752 MH: Microhomology, SC: Subcloning, TIDE: Tracking Indels by Decomposition.  
753 † injected RNP at the dose of 115 pg sgRNA and 245 pg Cas9 due to poor viability at  
754 higher doses

755

#### 756 **S5 Table**

757 Sample MENTHU output from select CRISPR-Cas9 targets used in this study. The  
758 output was obtained by using the entire target exon sequence with 40bp intronic  
759 sequence each on both 5' and 3' ends. The MENTHU output provides a 3' NGG PAM  
760 sequence for each gRNA targets (italicized and underlined). MENTHU gRNA outputs

761 that matched the target sequences used in this study are bolded. *Criteria 1* and *2* refer  
762 to 1) if top predicted microhomology arm is separated by 5bp or less, and 2) if the ratio  
763 of top to second predicted pattern scores is at least 1.5. MENTHU is programmed to  
764 terminate calculations if the target site is negative for Criterion 1. As a result, no gRNA  
765 sequence output is obtained for *chrd #1* and *mitfa #2*. Importantly, in two instances  
766 (*surf1* and *tgdf1*) where we only had Group 3 reagents, novel candidate Winner-Take-  
767 All sites were identified.

768

### 769 **S6 Table**

770 List of primers used in this study. All the primer sequences are provided in 5' → 3'  
771 order. For *urod* Reverse primer, M13F primer sequence was added at the 5' end of the  
772 endogenous target sequence (bolded and italicized). For SDM primers, intended point  
773 mutation is indicated by bold and italic.

774

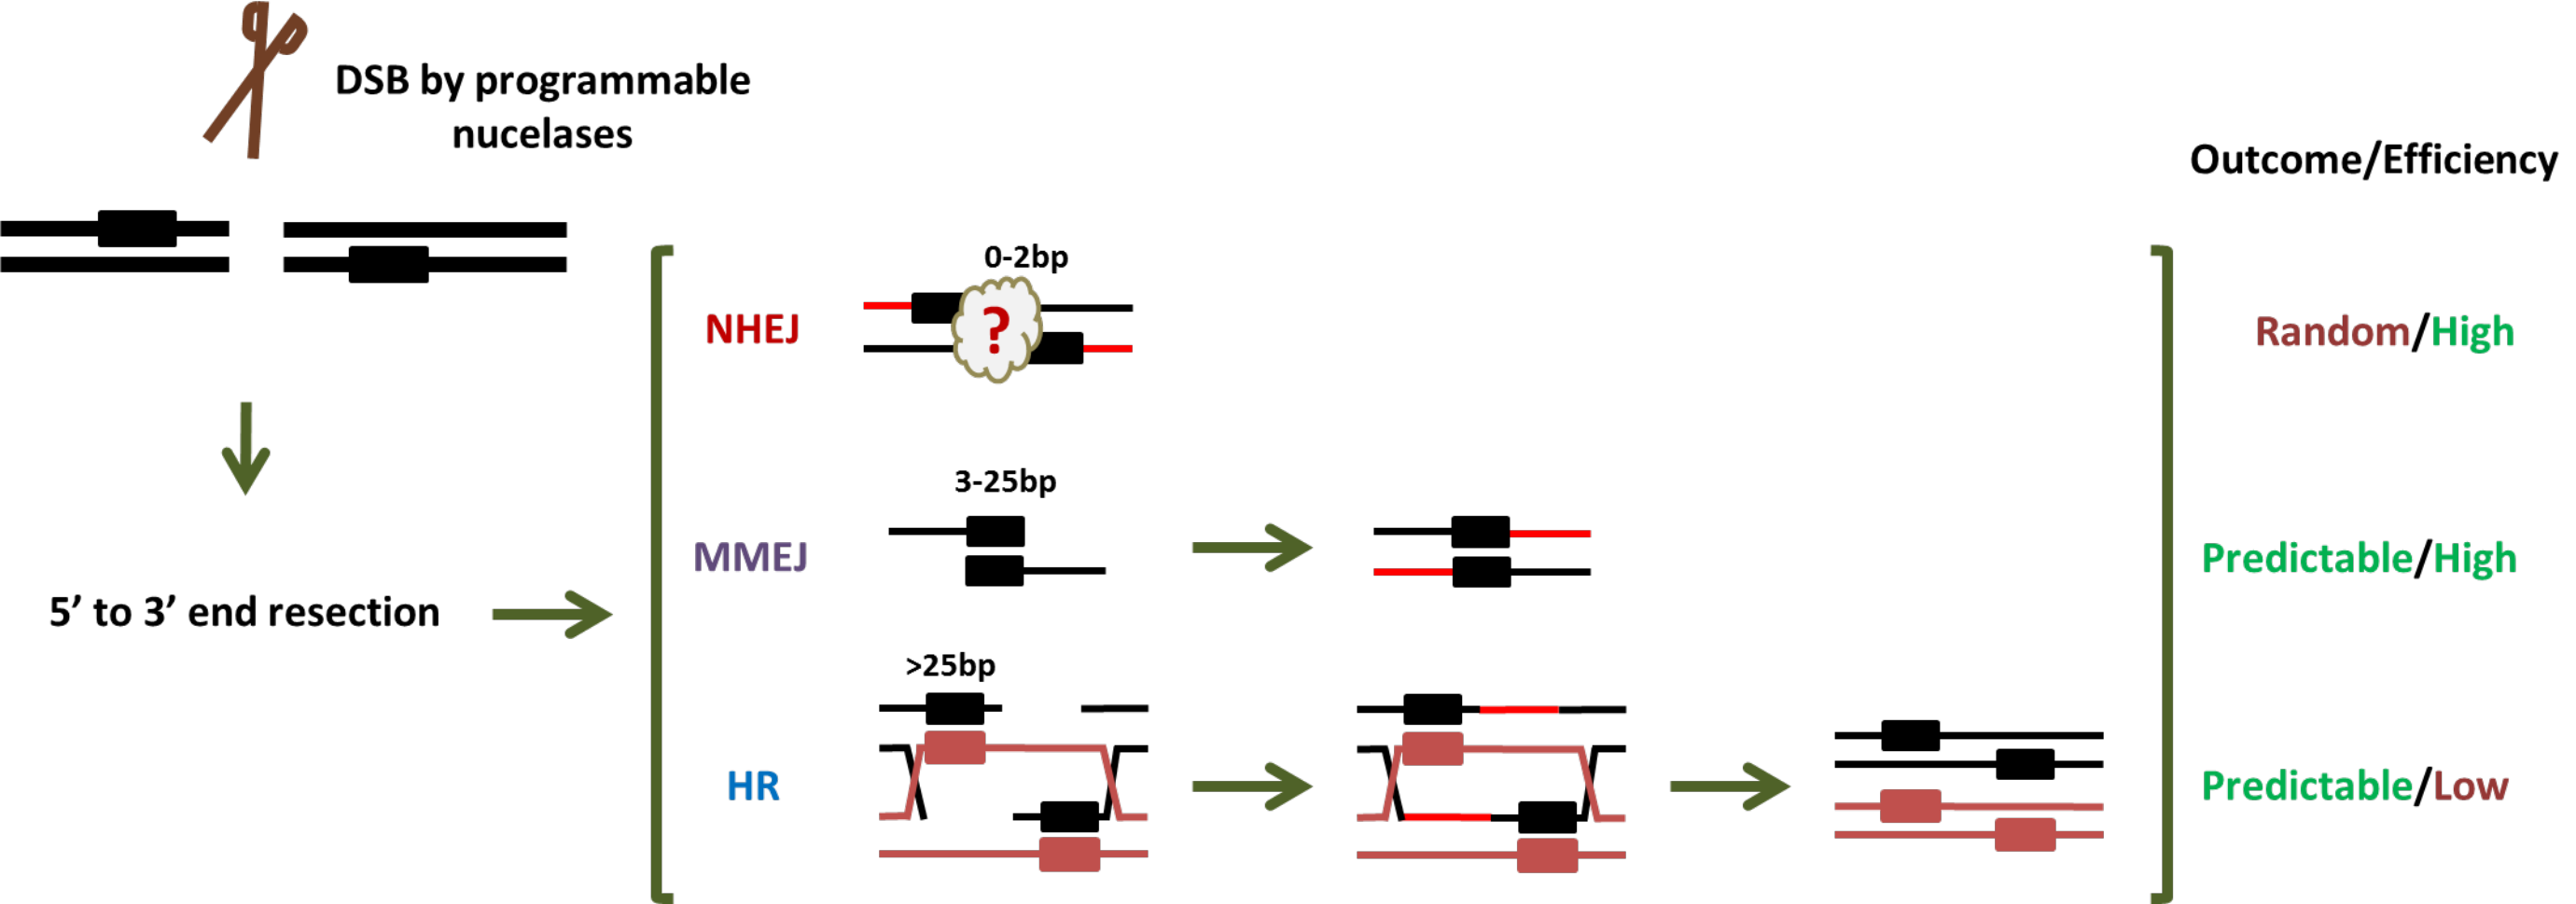

**A**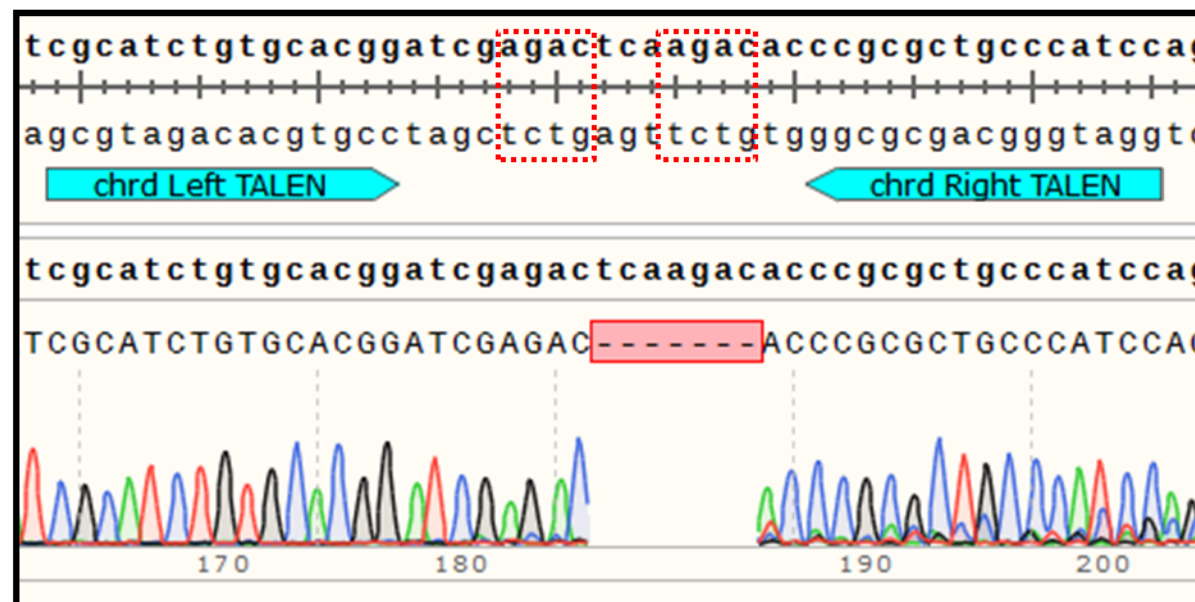

|        | Mutation        | MH used | Number of Colonies |
|--------|-----------------|---------|--------------------|
| WT     | —               | —       | 3                  |
| Mut #1 | 7bp del         | AGAC    | 16                 |
| Mut #2 | 7bp del         | N/A     | 2                  |
| Mut #3 | 11bp del/19 ins | N/A     | 2                  |
| Others | —               | —       | 12                 |

**B**

Uninjected

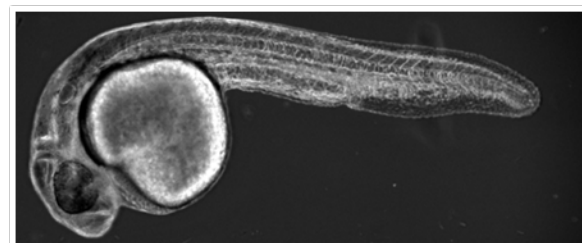

Injected

WT

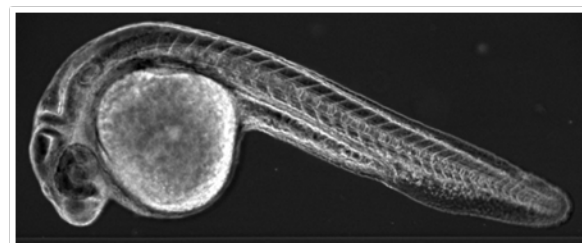

Weak

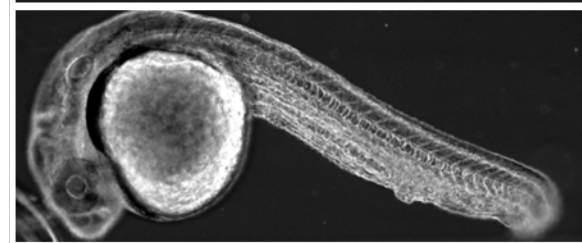

Mod

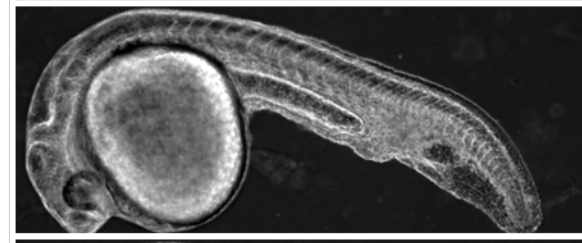

Strong

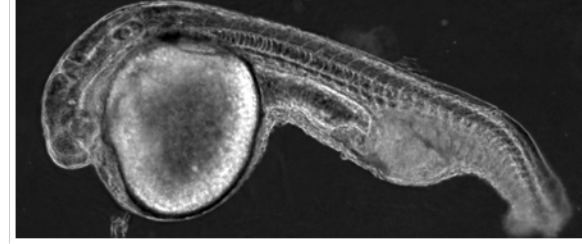

Penetrance

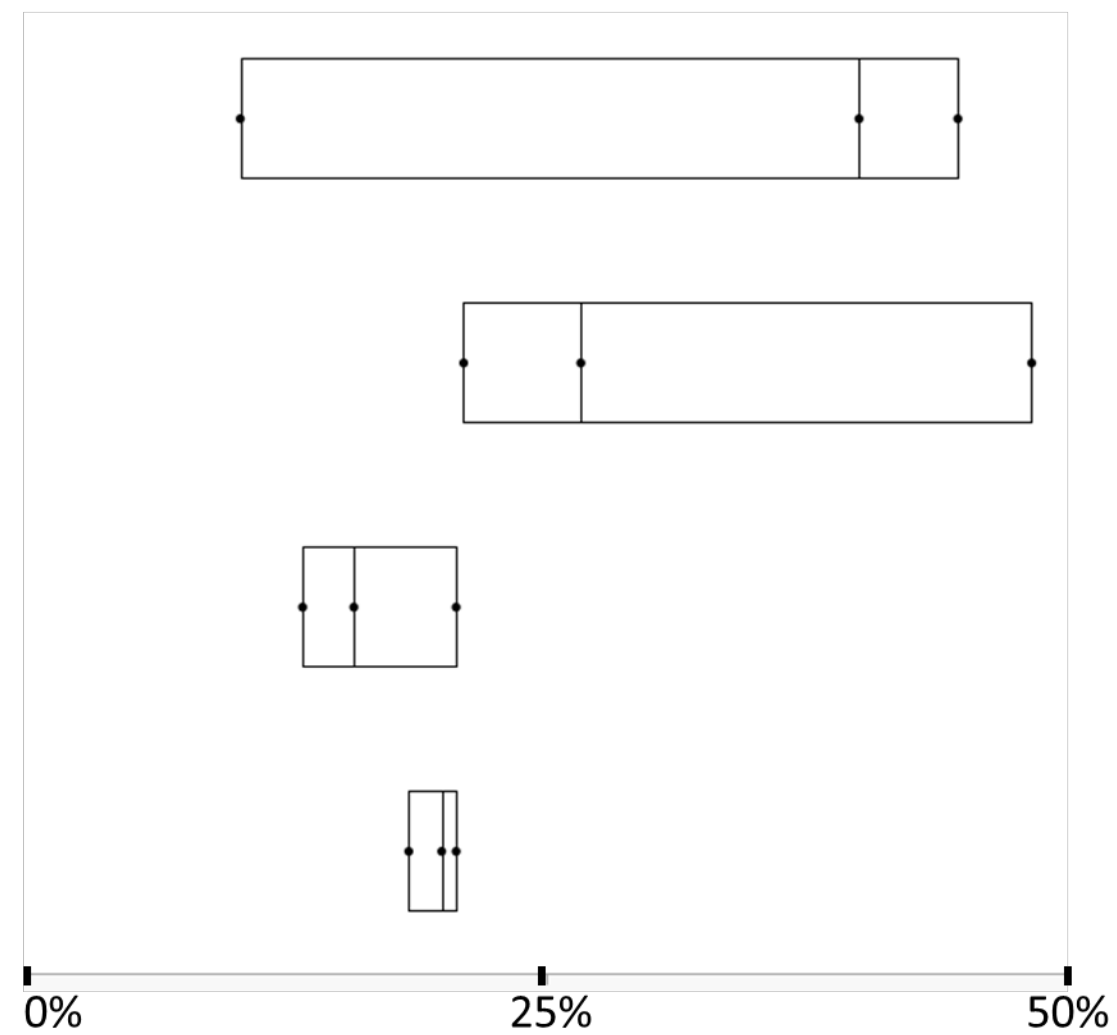



**A**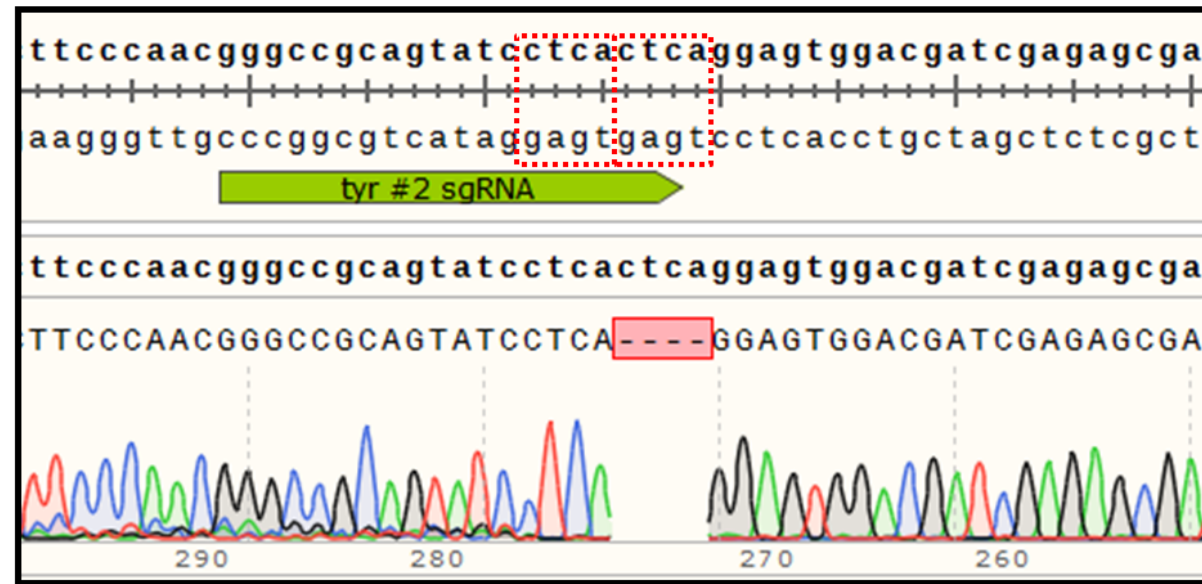

|        | Mutation | MH used | Number of Colonies |
|--------|----------|---------|--------------------|
| WT     | —        | —       | 0                  |
| Mut #1 | 4bp del  | CTCA    | 21                 |
| Others | —        | —       | 3                  |

**B**

Uninjected

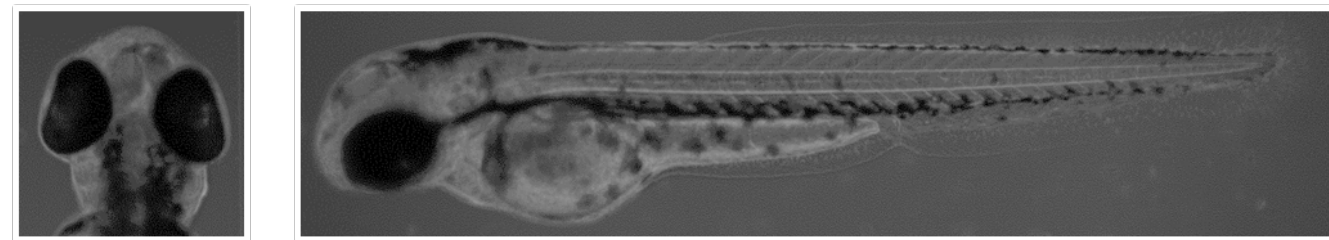

Injected

WT

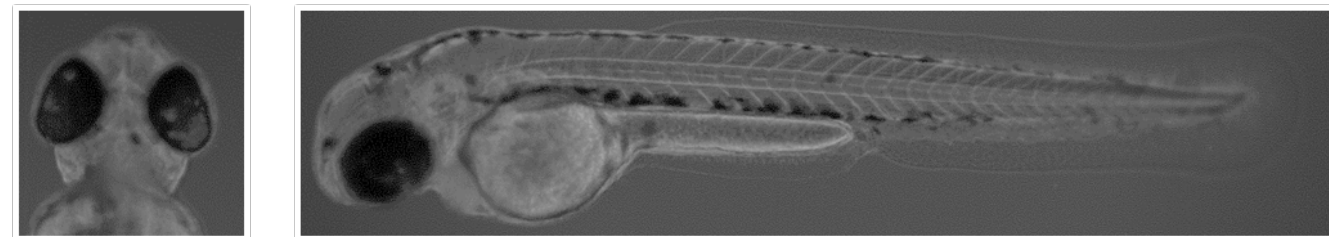

Weak

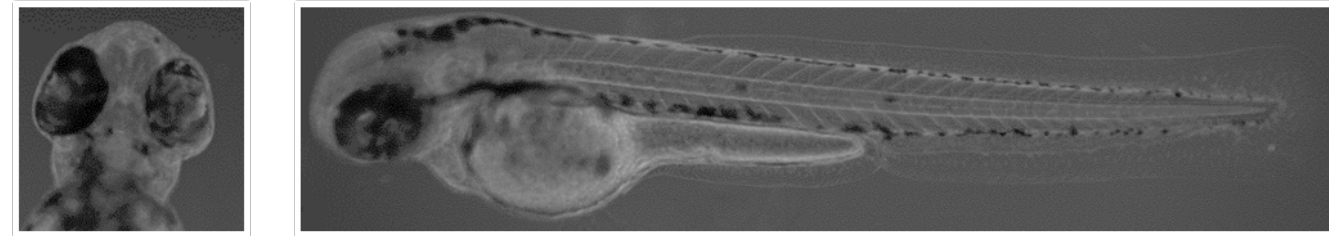

Mod

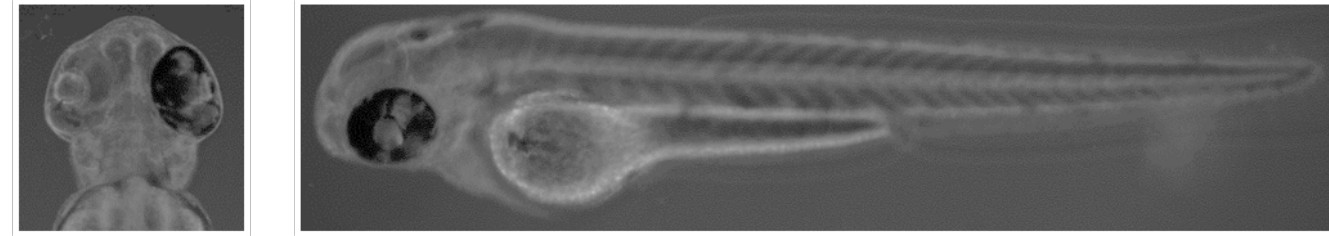

Strong

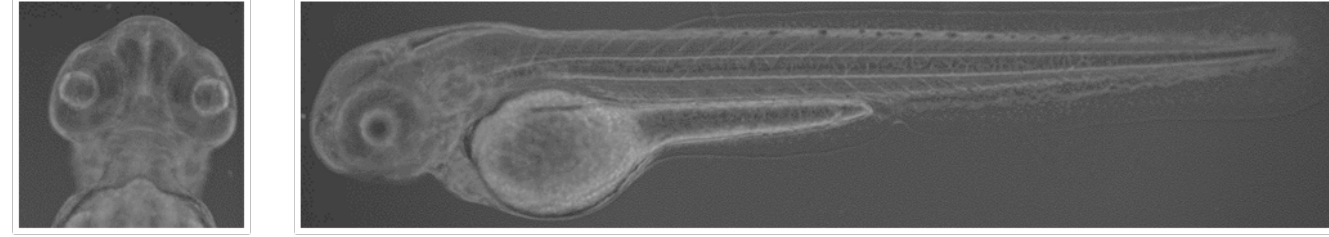

Penetrance

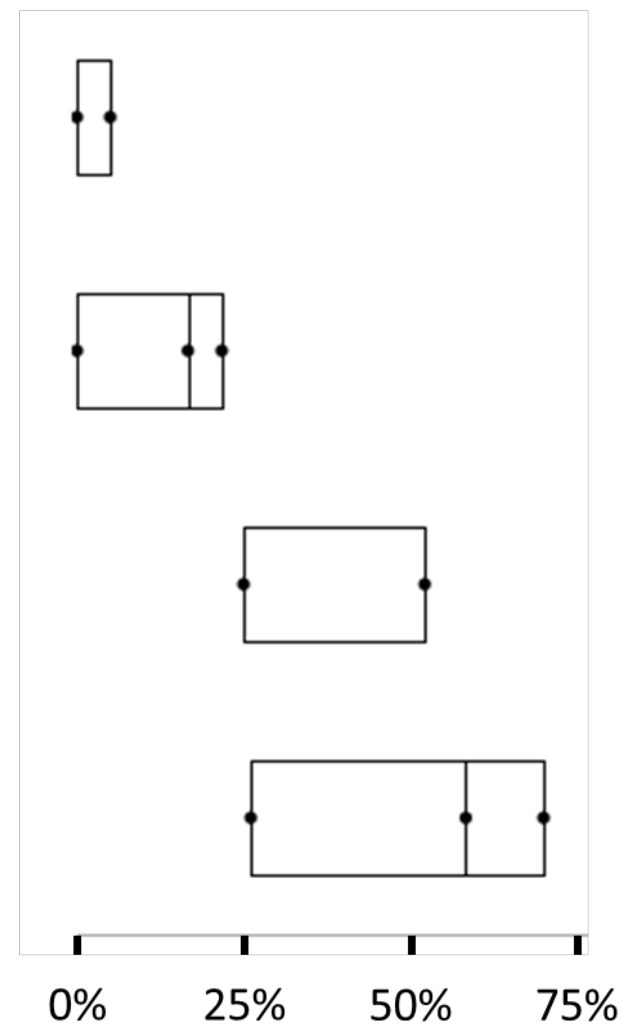

**A**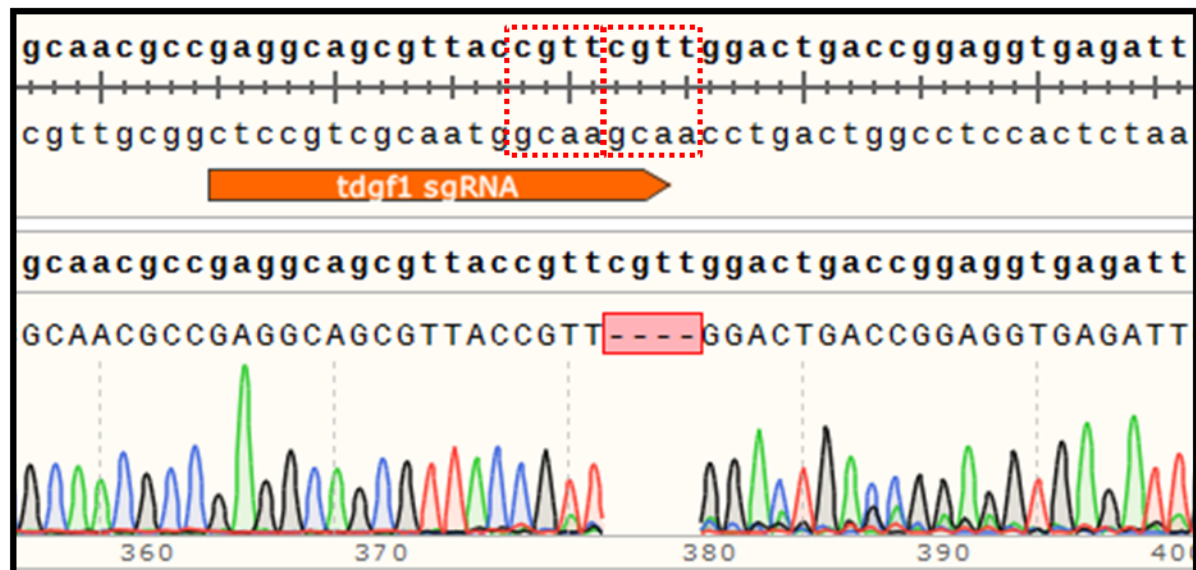

|        | Mutation        | MH used | Number of Colonies |
|--------|-----------------|---------|--------------------|
| WT     | —               | —       | 0                  |
| Mut #1 | 4bp del         | CGTT    | 28                 |
| Mut #2 | 13bp del        | —       | 4                  |
| Mut #3 | 2bp del/4bp ins | —       | 3                  |
| Mut #4 | 13bp del        | —       | 2                  |
| Others | —               | —       | 2                  |

**B**

Uninjected

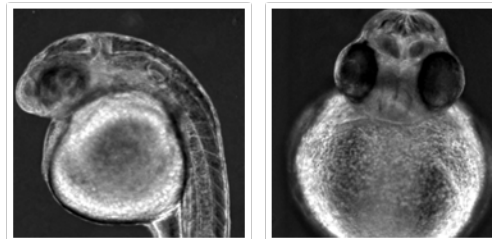

Injected

WT

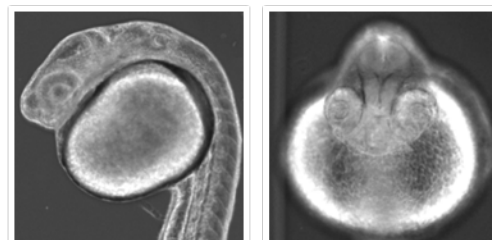

Weak

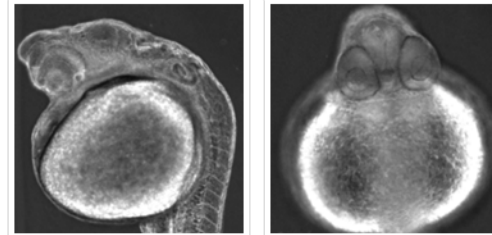

Mod

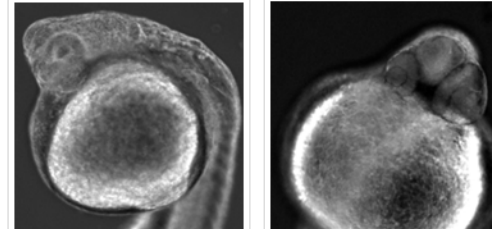

Strong

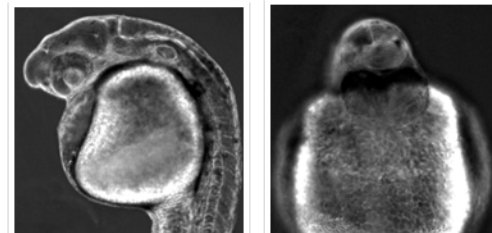

Penetrance

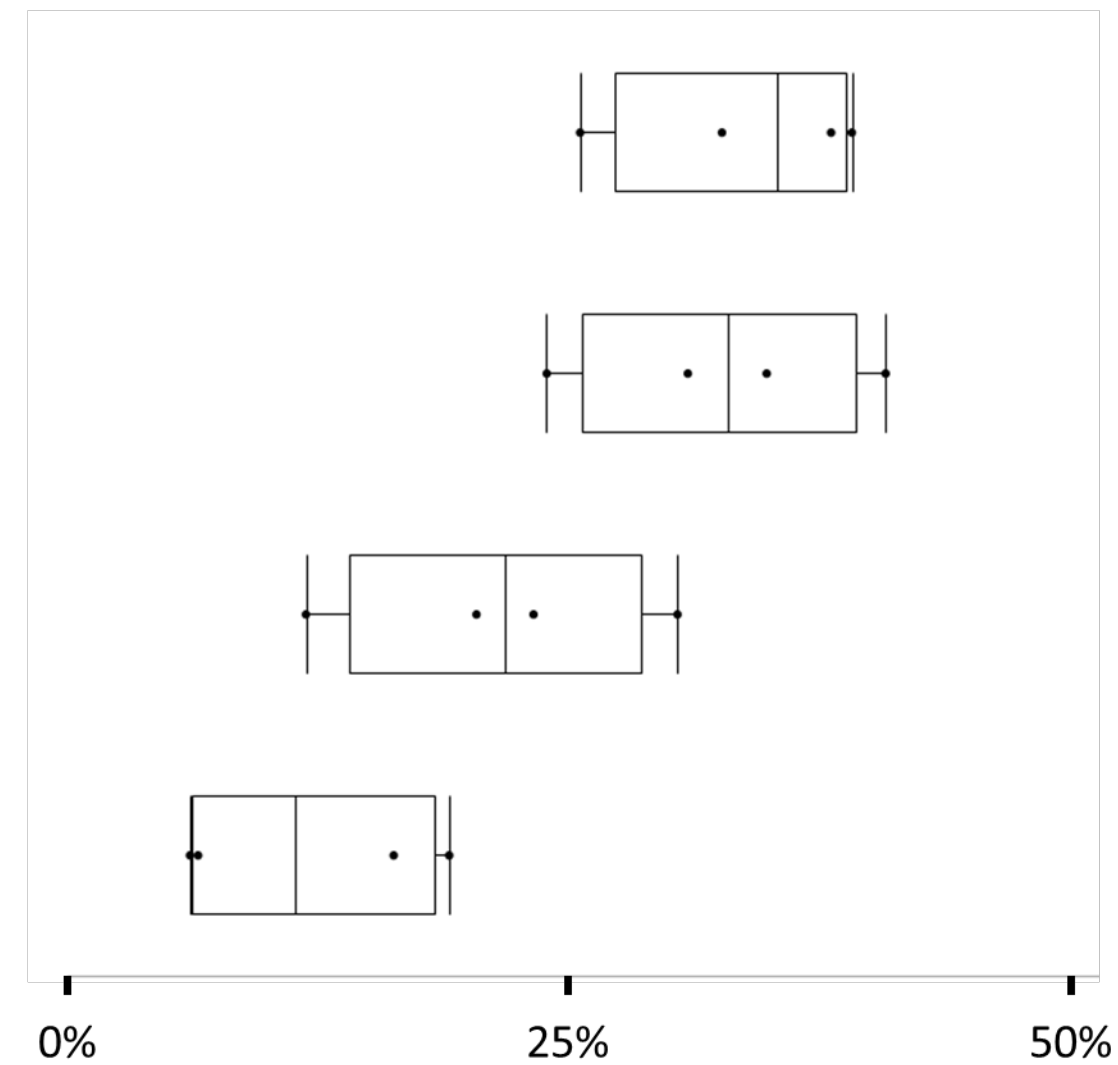



**A**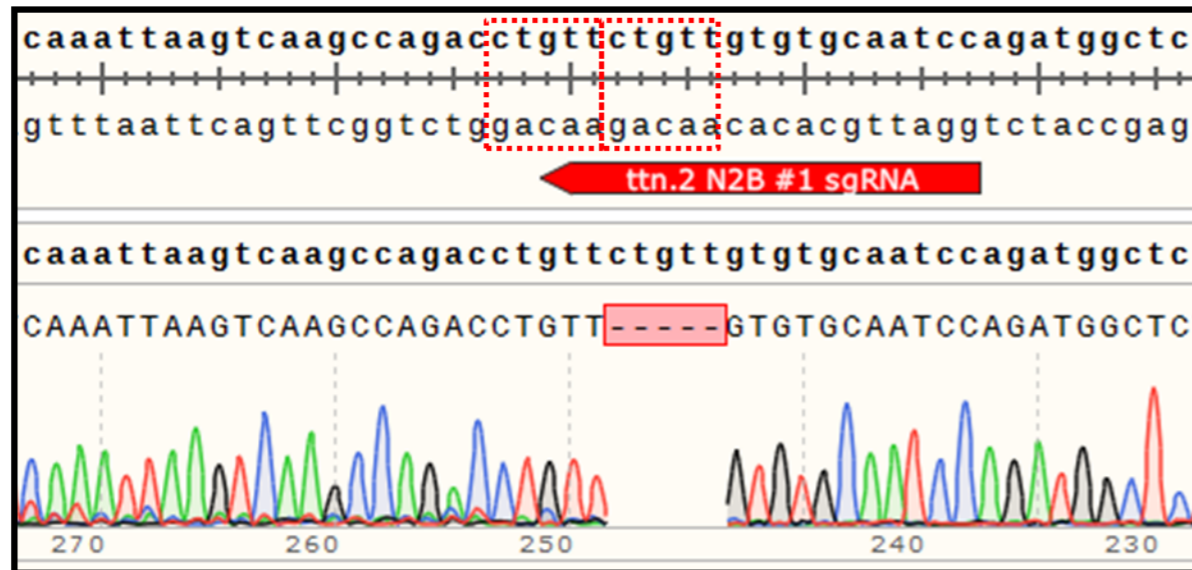

|        | Mutation | MH used | Number of Colonies |
|--------|----------|---------|--------------------|
| WT     | –        | –       | 1                  |
| Mut #1 | 5bp del  | CTGTT   | 18                 |
| Mut #2 | 8bp del  | TGT     | 2                  |
| Others | –        | –       | 1                  |

**B**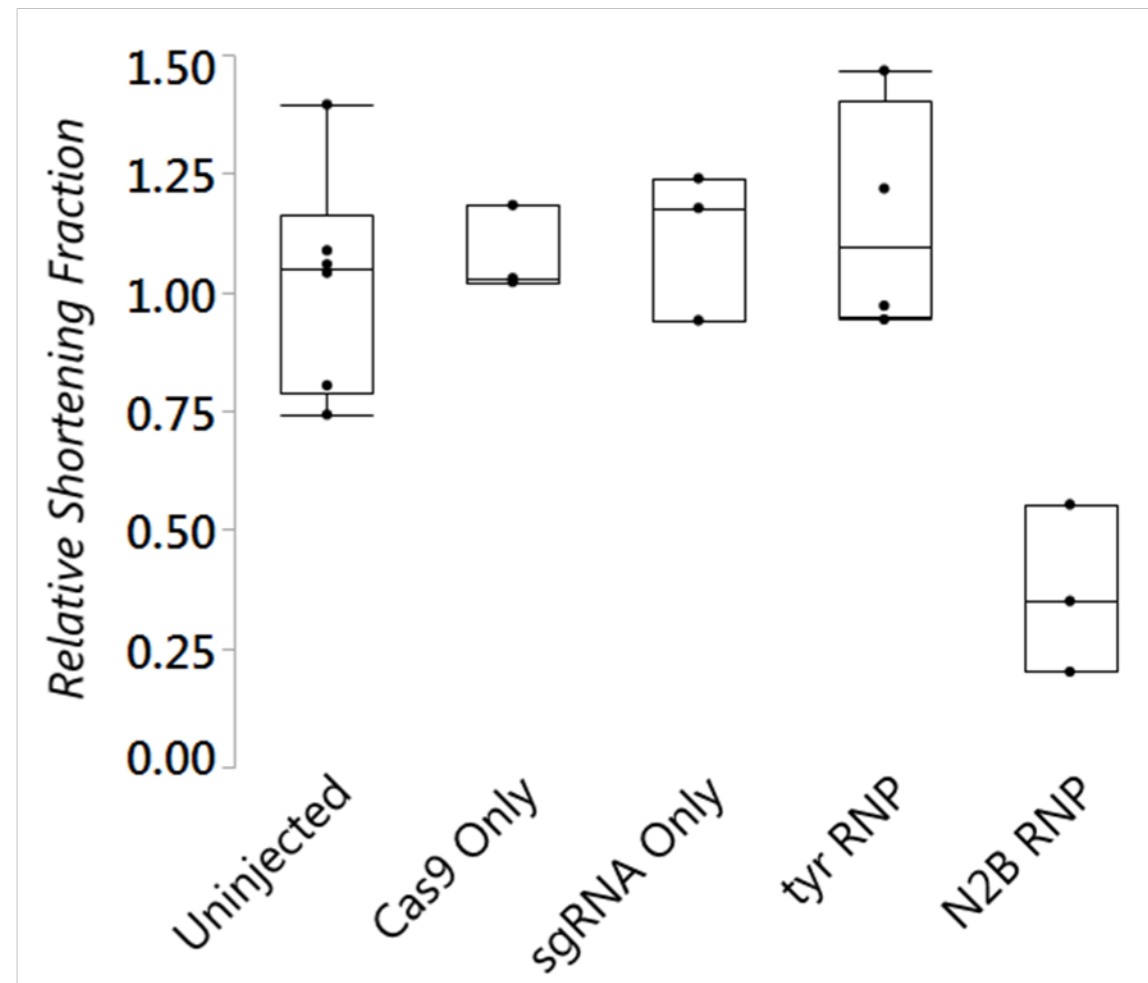

| p-Values       | <i>Cas9</i> | <i>sgRNA</i> | <i>tyrRNP</i> | <i>N2B RNP</i> |
|----------------|-------------|--------------|---------------|----------------|
| <i>Uninj</i>   | 1.0000      | 0.5186       | 0.5940        | <b>0.0282</b>  |
| <i>Cas9</i>    |             | 1.0000       | 1.0000        | 0.0809         |
| <i>sgRNA</i>   |             |              | 0.8597        | 0.0809         |
| <i>tyr RNP</i> |             |              |               | 0.0518         |



**A**

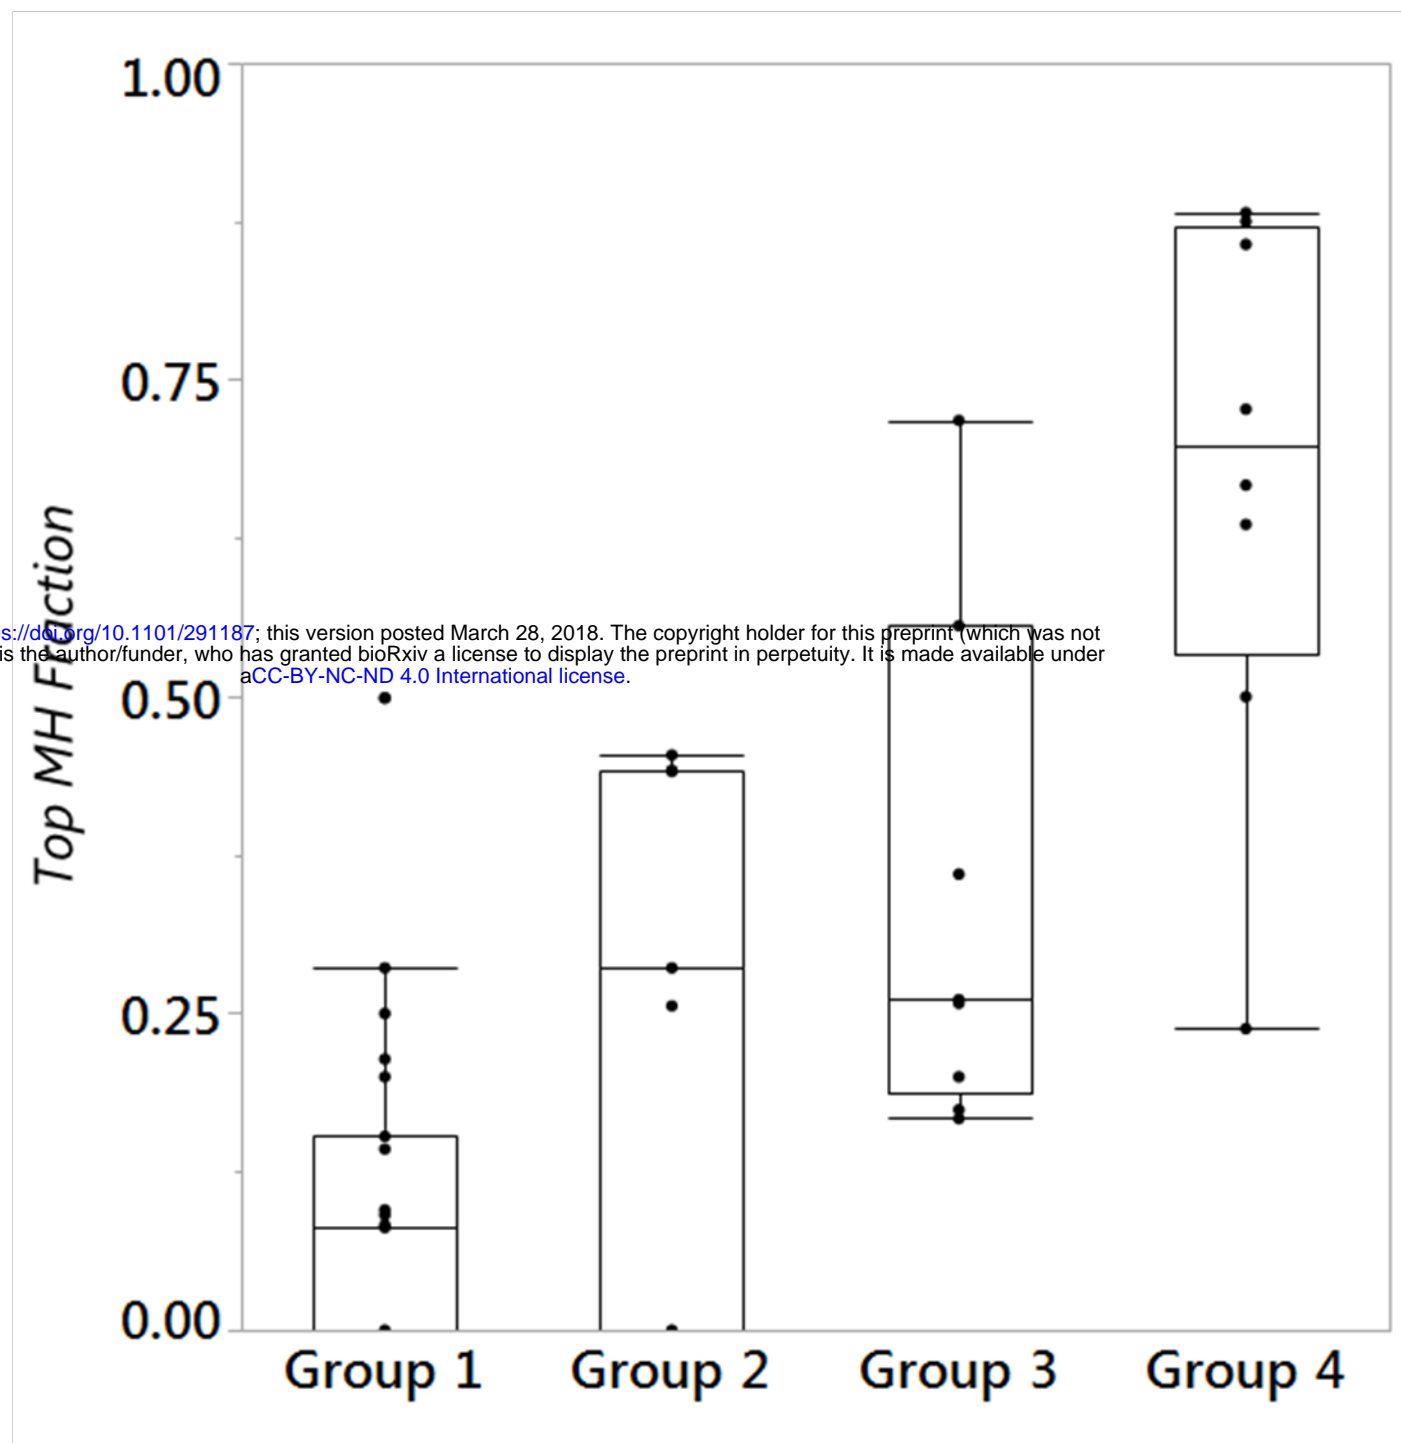

|                                |       | Distance between the top MH arm pair |         |
|--------------------------------|-------|--------------------------------------|---------|
|                                |       | > 5bp                                | ≤ 5bp   |
| Top/Second Pattern Score ratio | < 1.5 | Group 1                              | Group 3 |
|                                | ≥ 1.5 | Group 2                              | Group 4 |

| p-Values | Group 1 | Group 2 | Group 3 | Group 4  |
|----------|---------|---------|---------|----------|
| Group 1  |         | 0.0489  | 0.0004  | < 0.0001 |
| Group 2  |         |         | 0.5961  | 0.0092   |
| Group 3  |         |         |         | 0.0183   |
| Group 4  |         |         |         |          |

**C**

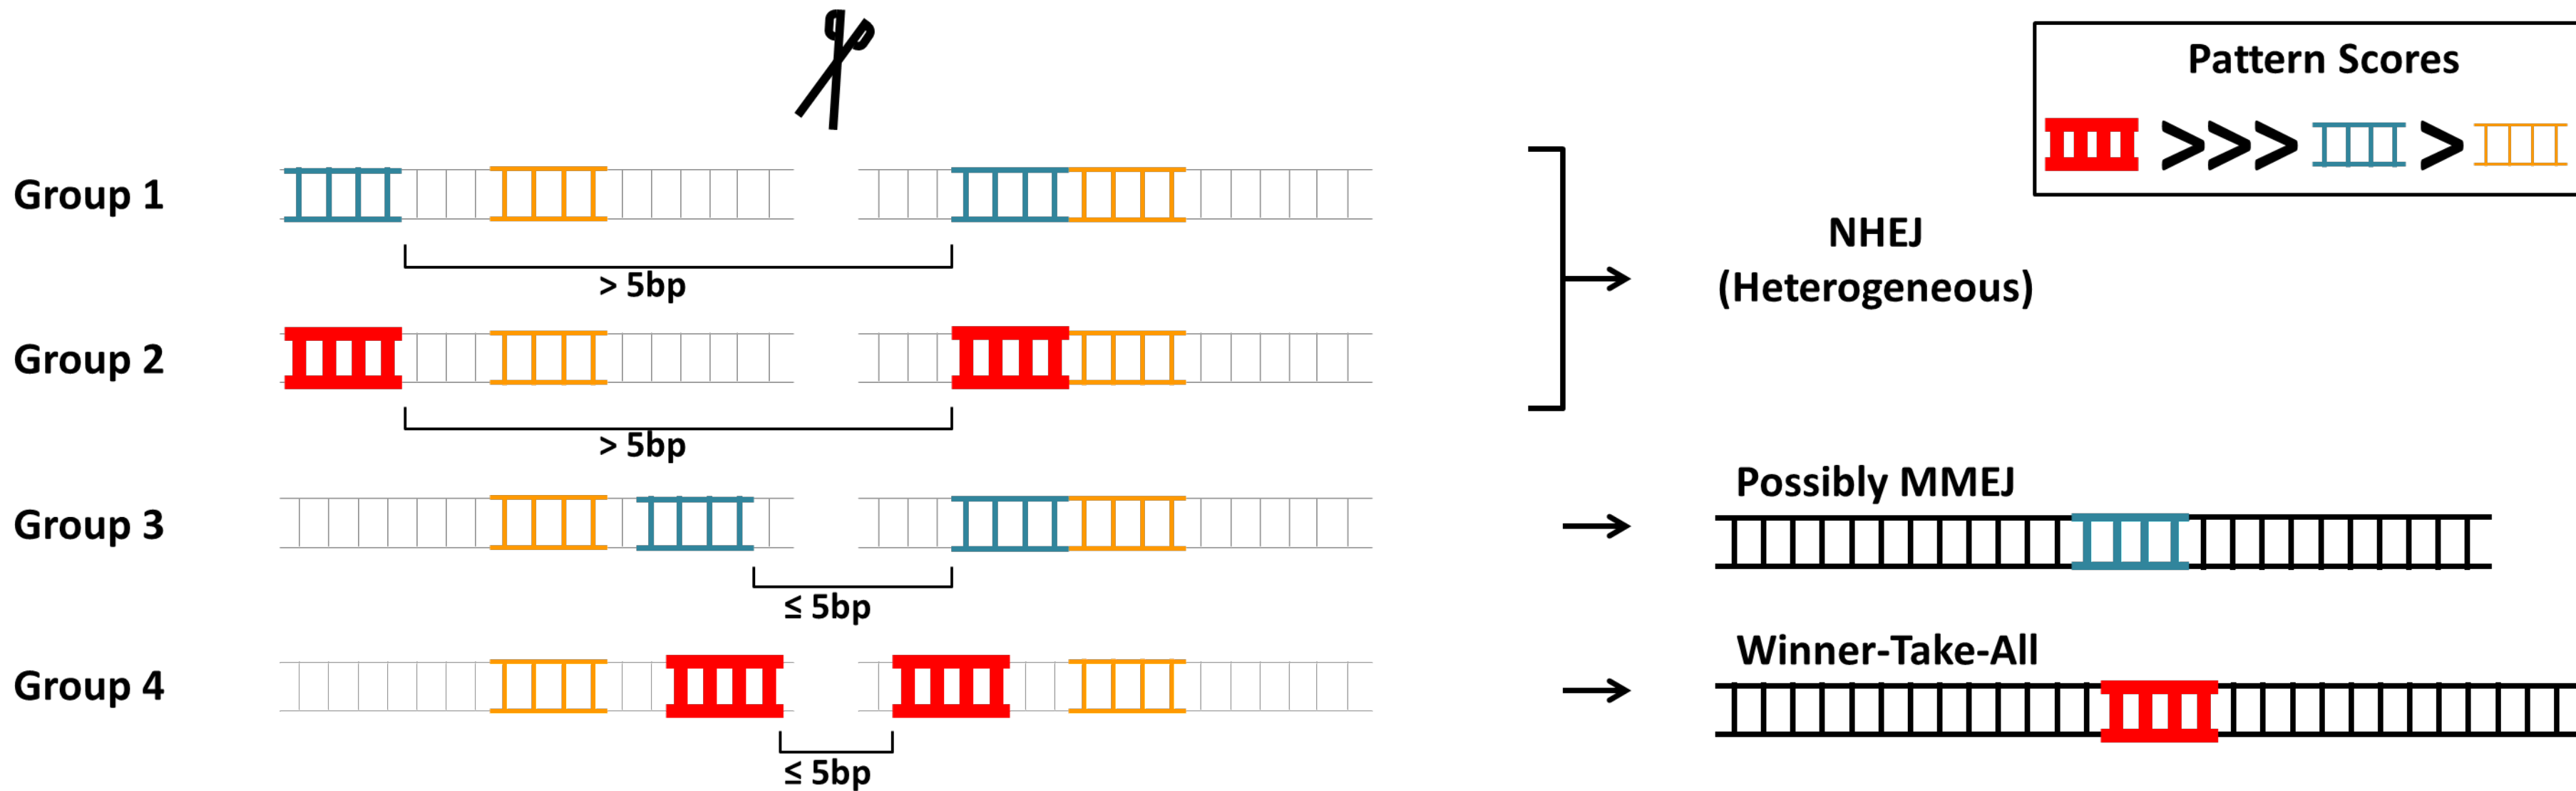

Source: https://www.biorxiv.org/content/biorxiv/early/2018/03/28/291187.full.pdf
